# Supplementary material for: Cost-effectiveness of the 3E model in diabetes management: a machine learning approach to assess long-term economic impact
Source: Front Public Health. 2025 May 23;13:1571546. doi: 10.3389/fpubh.2025.1571546 (PMC12141285; doi:10.3389/fpubh.2025.1571546)
Supplement: Supplementary file 1 [file Table_1.xlsx]

## Sheet: Patients
Name	Age	Sex (M/F/T)	Marital Status	MONTHLY INCOME	History of present illness	SYMPTOMATIC ENQUIRY	TREATMENT RECEIVED			Family History	Obstetric History	Dietetic History	General Physical Examination								H/O				Costing components
							DIET	DRUGS	INSULIN				HEIGHT (c.m)	WEIGHT (kgs)	BMI	SBP (mmHg)	DBP (mmHg)	FBS	PP	HbA1C	DFU	DN	DPN	IHD/CHF	Hospital visit					Out patient visit					Physician visit					Drugs					Laboratory
M Khalid saeed	48	M	Married	70000	Diabetes	Newly Dignose	1300	T.Tryptomer 10mg T.Shelcal 500mg Cap.lumia 60k	No	No	No	Yes	161	76	22.6	125	80	140	228	6.9	No	No	No	No	Baseline	3	6	18	24	Baseline	3	6	18	24	Baseline	3	6	18	24	Baseline	3	6	18	24	Baseline	3	6	18	24
Aneeta kumari	50	F	Married	8000	Diabetes	Newly Dignose	1260	T.metpill GB2 T.Vilpower M50/500 T.atchol 20HS	No	No	No	Yes	152	62	21.9	133	81	165	245	6.7	No	No	No	No	0	0	0	0	0	30	30	30	30	30	0	0	0	0	0	4243	2136	743	330	180	2530	1400	1220	1020	720
Rafi Ahmad	58	M	Married	19000	Diabetes	Newly Dignose	1350	Tab.tendia	No	No	No	Yes	159	59	24.2	130	79	143	270	6.2	No	No	No	No	0	0	0	0	0	30	30	30	30	30	0	0	0	0	0	2469	1105	638	340	180	2530	1520	1220	920	720
Haseena	40	F	Married	NIL	Diabetes	Newly Dignose	1470	T.Tryptomer 10mg T.Shelcal 500mg Cap.lumia 60k	No	No	No	Yes	147	68	22.1	127	82	156	303	6.9	No	No	No	No	0	0	0	0	0	30	30	30	30	30	0	0	0	0	0	1068	836	740	414	180	2230	1220	1020	1020	720
Charu Agarwal	32	F	Married	NIL	Diabetes	Newly Dignose	1350	T.Tryptomer 10mg T.Shelcal 500mg Cap.lumia 60k	No	Yes	Yes	No	155	72	23.4	135	80	167	247	7.1	No	No	No	No	0	0	0	0	0	30	30	30	30	30	0	0	0	0	0	4243	2715	816	414	226	2530	1400	1220	920	920
Atiqur Rehman	50	M	Married	17500	Diabetes	Newly Dignose	1280	Tab. Sitabite M(50/500)	No	No	No	Yes	153	87	22.7	130	80	170	235	7.9	No	No	No	No	0	0	0	0	0	30	30	30	30	30	0	0	0	0	0	4223	2483	907	537	330	2230	1100	1020	920	720
Furqaan	40	M	Married	15000	Diabetes	Newly Dignose	1400	T.torglip M50/500	No	Yes	No	Yes	156	71	24.6	124	80	138	300	7.9	No	No	No	No	0	0	0	0	0	30	30	30	30	30	0	0	0	0	0	836	740	530	414	180	2830	1400	1220	1020	720
Suresh Chand	35	M	Married	11000	Diabetes	Newly Dignose	1200	T. Exermet 500	No	No	No	Yes	160	60	22.9	129	80	122	264	7.1	No	No	No	No	0	0	0	0	0	30	30	30	30	30	0	0	0	0	0	720	640	540	330	180	2230	1020	720	720	420
Lekhraj Singh	44	M	Married	16000	Diabetes	Newly Dignose	1150	T. Exermet SR 500	No	No	No	Yes	165	67	23.3	120	81	155	220	6.2	No	No	No	No	0	0	0	0	0	30	30	30	30	30	0	0	0	0	0	540	414	330	330	180	2530	1400	1100	920	720
Rajni	42	F	Married	5000	Diabetes	Newly Dignose	1500	T. Exermet SR 500	No	No	Yes	No	142	58	23.8	131	79	162	281	7.9	No	No	No	No	0	0	0	0	0	30	30	30	30	30	0	0	0	0	0	180	180	180	180	180	2530	1400	1220	1100	920
Subodh Kumar	52	M	Married	20000	Diabetes	Newly Dignose	1300	T. Exermet SR 500	No	No	No	Yes	158	56	22.7	127	79	158	245	7.1	No	No	No	No	0	0	0	0	0	30	30	30	30	30	0	0	0	0	0	180	180	180	180	180	2530	1400	1220	1020	720
Jalaluddin	40	M	Married	14500	Diabetes	Newly Dignose	1200	Tab. Sitabte M(50/500)	No	No	No	Yes	152	49	24.4	135	82	170	264	7.1	No	No	No	No	0	0	0	0	0	30	30	30	30	30	0	0	0	0	0	180	180	180	180	180	2530	1400	1100	1020	720
Guddi	35	F	Married	NIL	Diabetes	Newly Dignose	1420	T. Exermet SR 500	No	No	No	Yes	146	52	25.01	122	80	145	305	7.2	No	No	No	No	0	0	0	0	0	30	30	30	30	30	0	0	0	0	0	836	530	414	330	180	2530	1400	1100	920	920
Sushma	50	F	Married	NIL	Diabetes	Newly Dignose	1500	T. Amlong 10mg T.naproxen 500mg T.dupent 40mg	No	No	No	Yes	148	74	23.2	137	80	133	260	6.5	No	No	No	No	0	0	0	0	0	30	30	30	30	30	0	0	0	0	0	180	180	180	180	180	2530	1400	1220	1020	920
Lokesh Kumar	35	M	Married	9000	Diabetes	Newly Dignose	1200	Cap. Intenarve Tab.Amlopres TL 40mg	No	No	Yes	No	157	64	24.3	134	79	164	311	6.4	No	No	No	No	0	0	0	0	0	30	30	30	30	30	0	0	0	0	0	1530	1158	825	564	180	2230	1020	920	720	720
Ram Avtar	60	M	Married	19000	Diabetes	Newly Dignose	1480	Tab.dapavel M(10/500) Tab.Glycomet SR 500	No	No	Yes	No	158	68	22.5	136	79	128	287	6.9	No	No	No	No	0	0	0	0	0	30	30	30	30	30	0	0	0	0	0	2456	1125	745	456	226	2530	1400	1220	920	720
Shakeela	45	F	Married	NIL	Diabetes	Newly Dignose	1260	Tab.Torglip M 50/500 Cap.Rejunex CD3	No	No	No	Yes	150	65	21.9	128	79	150	238	6.1	No	No	No	No	0	0	0	0	0	30	30	30	30	30	0	0	0	0	0	1158	975	836	414	225	2530	1400	1220	920	720
Anwari	45	M	Married	15000	Diabetes	Newly Dignose	1300	Tab.UDAPA-S(10X100)X01)Xabf Tab.Glimfirst MV-2xM Tab.Caldan MZ	No	No	No	Yes	160	73	22.4	125	79	135	315	6.2	No	No	No	No	0	0	0	0	0	30	30	30	30	30	0	0	0	0	0	2700	1525	946	425	226	2230	920	920	720	420
Nazia Tahri	58	F	Married	7000	Diabetes	Newly Dignose	1480	Tab. Dapaturn-M(10x1000)mg Tab.cresar(T.40) Cap.Rozuor-ASP(75/10) Tab.Dolo 650mg Cap.Pass	No	No	No	Yes	151	58	22.8	127	80	142	303	7	No	No	No	No	0	0	0	0	0	30	30	30	30	30	0	0	0	0	0	5323	2569	925	623	307	2230	1220	920	720	420
Shareefan Begum	70	F	Married	NIL	Diabetes	Newly Dignose	1500	Tab Udapa-S T. Glimfirst Mv2	No	No	No	Yes	154	70	23.1	138	79	148	291	7	No	No	No	No	0	0	0	0	0	30	30	30	30	30	0	0	0	0	0	2379	1125	815	506	330	2530	1400	1220	1220	1100
Amar Pal	60	M	Married	18000	Diabetes	Newly Dignose	1500	T. Exermet SR 500	No	No	No	Yes	170	60	24.5	130	80	122	250	6.5	No	No	No	No	0	0	0	0	0	30	30	30	30	30	0	0	0	0	0	3086	2146	885	426	225	2830	1220	1100	920	420
Shamshida	50	F	Married	NIL	Diabetes	Newly Dignose	1490	Tab. Sitabte M(50/500)	No	Yes	Yes	No	145	50	22.3	132	79	157	237	7.2	No	No	No	No	0	0	0	0	0	30	30	30	30	30	0	0	0	0	0	180	180	180	180	180	3130	2530	1520	1220	920
Ishrat	47	F	Married	6500	Diabetes	Newly Dignose	1600	Tab. Sitabte M(50/500)	No	No	No	Yes	155	47	23.8	124	80	120	309	8.1	No	No	No	No	0	0	0	0	0	30	30	30	30	30	0	0	0	0	0	1543	878	515	375	220	2230	1400	920	720	420
Om Prakash	55	M	Married	15000	Diabetes	Newly Dignose	1500	T. Dupent(40), T. Exermet SR(500), T. CTD-T, Syp. Dupent gel	No	No	No	Yes	168	55	23.4	129	79	164	258	6.5	No	No	No	No	0	0	0	0	0	30	30	30	30	30	0	0	0	0	0	9489	6215	3740	843	330	2530	1400	1220	1020	920
Ruksara	52	F	Married	NIL	Diabetes	Newly Dignose	1250	T. Exermet SR 500	No	No	No	Yes	143	52	23.1	123	79	147	316	7.9	No	No	No	No	0	0	0	0	0	30	30	30	30	30	0	0	0	0	0	720	645	540	414	180	2230	920	920	720	420
Bilqees Begum	45	F	Married	NIL	Diabetes	Newly Dignose	1500	T. Dolo 650, T.Torglip m 50/500, T.Amaryl m1	No	No	No	Yes	156	45	22.6	120	81	169	248	7.2	No	No	No	No	0	0	0	0	0	30	30	30	30	30	0	0	0	0	0	1813	927	525	374	220	2230	1100	720	720	420
Gulrez	42	M	Married	12000	Diabetes	Newly Dignose	1600	T. Sitacip m 50/500, T . Thyronorm 50	No	No	Yes	No	165	42	24.9	134	80	154	215	7.9	No	No	No	No	0	0	0	0	0	30	30	30	30	30	0	0	0	0	0	2160	1105	684	414	270	2230	1020	1020	920	720
U.B Daniel	62	M	Married	16500	Diabetes	Newly Dignose	1600	T. Udapa 10*1, T. Meganeuron*, T. Galvus met(50/500)	No	No	No	Yes	182	62	22.5	128	80	149	268	7.1	No	No	No	No	0	0	0	0	0	30	30	30	30	30	0	0	0	0	0	4179	3007	1085	556	226	2230	1100	920	720	420
Shehnaz Fatima	50	F	Married	9500	Diabetes	Newly Dignose	1300	T. Glimfirst MV2, T. Dolo 650, T. Cloze 0.25mg	No	No	No	Yes	150	50	23.6	136	81	160	277	7.2	No	No	No	No	0	0	0	0	0	30	30	30	30	30	0	0	0	0	0	4223	3107	1345	627	414	2530	1400	1100	1100	1020
Ishrat	45	F	Married	NIL	Diabetes	Newly Dignose	1500	T. ONDERO MET 2.5/500mg, T. ELTROXIN 50mg	No	No	Yes	No	140	45	24.5	127	79	131	234	8.1	No	No	No	No	0	0	0	0	0	30	30	30	30	30	0	0	0	0	0	2778	1345	756	408	226	2830	1220	1100	920	420
Zakir khan	59	M	Married	15000	Diabetes	Newly Dignose	1500	T. Dapanorm m 500/10, T.Glycomet GP 1	No	Yes	No	Yes	157	76	24.8	130	79	145	258	7.1	No	No	No	No	0	0	0	0	0	30	30	30	30	30	0	0	0	0	0	1608	956	578	305	180	2530	1400	1220	1020	720
Mrs. Shamsheran	50	F	Married	7500	Diabetes	Newly Dignose	1350	T. Dapanorm trio (10/100/300), T. Revelol(25), T. Exermel 500mg	No	Yes	No	Yes	146	52	22.7	125	79	130	307	6.5	No	No	No	No	0	0	0	0	0	30	30	30	30	30	0	0	0	0	0	1890	956	414	325	180	2230	1220	1020	920	720
Mr. Mehmood Ahmad	50	M	Married	13000	Diabetes	Newly Dignose	1500	T. Glimfirst MV2	No	No	No	Yes	158	74	23.5	129	81	162	295	6.9	No	No	No	No	0	0	0	0	0	30	30	30	30	30	0	0	0	0	0	1620	973	545	378	220	2530	1400	1100	1020	720
Mrs. Kiran Devi	40	F	Married	NIL	Diabetes	Newly Dignose	1260	T. Glimfirst MV2, T. Dolo 650, T. Cloze 0.25mg	No	No	No	Yes	143	60	22.6	126	81	125	244	7.1	No	No	No	No	0	0	0	0	0	30	30	30	30	30	0	0	0	0	0	1158	1068	920	540	180	2230	1100	920	720	420
Mr. Subedar Singh	54	M	Married	17000	Diabetes	Newly Dignose	1450	T. Glimfirst MV2, T. Cloze 0.25mg	No	No	No	Yes	157	68	23.7	133	82	137	301	7.2	No	No	No	No	0	0	0	0	0	30	30	30	30	30	0	0	0	0	0	2392	1146	716	356	200	2530	1400	1020	1020	720
Mrs. Idreesan	45	F	Married	NIL	Diabetes	Newly Dignose	1300	T. Deben MR, Cap. Rabitis DRS, T. Gabaneuron NT	No	No	No	Yes	147	57	24.9	135	80	142	268	7.5	No	No	No	No	0	0	0	0	0	30	30	30	30	30	0	0	0	0	0	180	180	180	180	180	2230	1100	1020	720	720
farha naaz	39	F	Married	NIL	Diabetes	Newly Dignose	1200	Tab Sitabite M 50/500,Tab Pregator75,Tab Clre D	No	No	No	Yes	145	48	23.1	127	79	140	254	7.2	No	No	No	No	0	0	0	0	0	30	30	30	30	30	0	0	0	0	0	1530	986	740	414	250	2230	1220	1020	1100	1020
Faisal Mitter	46	M	Married	7000	Diabetes	Newly Dignose	1400	Tab nertri 8,Cap Intenerve,Tab Caldan	No	No	No	Yes	156	65	22.8	123	80	133	218	7.3	No	No	No	No	0	0	0	0	0	30	30	30	30	30	0	0	0	0	0	5323	2716	1035	548	180	2830	1100	920	720	720
Zeeshan Ratta	52	M	Married	11000	Diabetes	Newly Dignose	1600	Tab Glufirst 2mg,Tab Dapanorm Trio,Tab Exermet500mg,CaldamM2,Tab Revelol25mg	No	No	No	Yes	156	63	21.9	120	80	155	237	7.1	No	No	No	No	0	0	0	0	0	30	30	30	30	30	0	0	0	0	0	180	180	180	180	180	3130	2230	1400	920	720
Pranab Chohan	58	M	Married	18000	Diabetes	Newly Dignose	1600	Tab Glufirst -GV-2,Tab Dapasaen-S,Tab Intenerve,Tab -,Rosuless F,Tab Insart-CC,Cap Rabysam	No	No	Yes	No	158	67	23.4	126	81	148	305	6.4	No	No	No	No	0	0	0	0	0	30	30	30	30	30	0	0	0	0	0	2700	1348	845	378	220	2530	1400	1220	1020	720
Anees Karan	41	M	Married	5000	Diabetes	Newly Dignose	1250	Tab Galvus Met 50/500,Tab Udapa,Tab pregab,Tab Meganeuron	No	No	No	Yes	160	75	22.8	128	79	121	222	6.8	No	No	No	No	0	0	0	0	0	30	30	30	30	30	0	0	0	0	0	2443	1256	715	427	256	2230	1020	720	920	720
Aslam Shukla	56	M	Married	17000	Diabetes	Newly Dignose	1500	Tab Sitacip-M ,TabThyronorm ,Cap Intenerve	No	Yes	No	Yes	155	71	22.4	137	79	139	270	6.9	No	No	No	No	0	0	0	0	0	30	30	30	30	30	0	0	0	0	0	1608	925	485	250	180	2230	1100	920	720	420
Fakaruddin Bhatti	50	M	Married	11000	Diabetes	Newly Dignose	1500	Glycohale-FB ,Tab Dupent 40mg ,Syp Dupent-Gel,TabCTD-T 6.25mg ,Cap Ecosprin-AV,Tab Exermet SR	No	No	No	Yes	161	83	23.4	132	80	154	247	6.4	No	No	No	No	0	0	0	0	0	30	30	30	30	30	0	0	0	0	0	1068	625	330	290	180	2830	1400	1220	1100	720
Jamshed Kabra	57	M	Married	18000	Diabetes	Newly Dignose	1560	Tab Glufirst GV-2	No	No	No	Yes	154	78	24.1	130	79	143	310	6.4	No	No	No	No	0	0	0	0	0	30	30	30	30	30	0	0	0	0	0	1543	725	476	330	180	2230	1220	1020	1020	920
Divya Garg	46	F	Married	NIL	Diabetes	Newly Dignose	1250	Tab GlufirstGU 2 ,Tab Sitabite50/500 ,Tab cloze0.25mg	No	No	Yes	No	149	54	22.9	132	80	162	293	7.1	No	No	No	No	0	0	0	0	0	30	30	30	30	30	0	0	0	0	0	4223	3046	1162	515	180	2230	1100	720	920	720
Venkat Garde	49	M	Married	10000	Diabetes	Newly Dignose	1300	Tab Daporm trio 500mg	No	No	No	Yes	156	75	24.2	138	79	155	235	6.6	No	No	No	No	0	0	0	0	0	30	30	30	30	30	0	0	0	0	0	2160	1078	585	330	180	2830	1400	1220	1020	720
Mayawati Walia	44	F	Married	10000	Diabetes	Newly Dignose	1420	Tab Uysov -M ,Tab Udapa	No	No	Yes	No	150	80	23.5	134	81	130	281	7.1	No	No	No	No	0	0	0	0	0	30	30	30	30	30	0	0	0	0	0	180	180	180	180	180	2530	1520	1400	920	720
Teena Palan	48	F	Married	8000	Diabetes	Newly Dignose	1250	Tab Gylcomet SR	No	No	No	Yes	147	62	22.9	126	81	167	256	7.1	No	No	No	No	0	0	0	0	0	30	30	30	30	30	0	0	0	0	0	720	720	645	414	240	2530	1400	1020	1020	920
Rahim Dara	53	M	Married	12000	Diabetes	Newly Dignose	1500	Tab Glizid -M, Tab Vidolgo -M ,Tab Amlong	No	No	No	Yes	162	85	22.4	134	81	125	234	7.6	No	No	No	No	0	0	0	0	0	30	30	30	30	30	0	0	0	0	0	1890	985	525	330	180	2230	1100	1020	720	420
Isha Mittal	45	F	Married	NIL	Diabetes	Newly Dignose	1300	Tab Cyra	No	No	No	Yes	148	49	23.5	138	79	141	278	7.5	No	No	No	No	0	0	0	0	0	30	30	30	30	30	0	0	0	0	0	4179	2835	1620	816	330	2230	1100	920	720	420
Zeenat Usman	42	M	Married	17500	Diabetes	Newly Dignose	1260	Tab Ecosprin	No	No	Yes	No	165	89	23.8	123	81	136	305	7.4	No	No	No	No	0	0	0	0	0	30	30	30	30	30	0	0	0	0	0	9515	6107	3518	740	414	2530	1220	1220	1020	920
Radheshyam Gupta	54	M	Married	15000	Diabetes	Newly Dignose	1500	Tab Glufirst GV 2 ,Tab Dapsitn	No	No	No	Yes	160	80	22.7	127	80	157	316	6.8	No	No	No	No	0	0	0	0	0	30	30	30	30	30	0	0	0	0	0	1672	825	478	345	220	3130	2630	1520	1100	720
Umesh Comar	42	M	Married	13500	Diabetes	Newly Dignose	1200	Tab Amaryl ,Tab Sitara -M ,Tab Ecosprin AU 75/20	No	No	No	Yes	158	72	22.5	135	81	164	288	6.4	No	No	No	No	0	0	0	0	0	30	30	30	30	30	0	0	0	0	0	180	180	180	180	180	2530	1400	1220	1020	920
Tanuja Behl	44	F	Married	NIL	Diabetes	Newly Dignose	1200	Tab Zomelis-DM	No	No	No	Yes	150	50	22.9	121	80	122	274	7	No	No	No	No	0	0	0	0	0	30	30	30	30	30	0	0	0	0	0	2443	995	637	330	180	2530	1400	1100	920	720
Sushmita Prakash	49	F	Married	NIL	Diabetes	Newly Dignose	1350	Tab Zoryl1mg ,Tab Golnus-met 50/100,Tab Preyaba-M,Tab Typomer10	No	No	No	Yes	145	86	22.7	129	79	145	256	7.1	No	No	No	No	0	0	0	0	0	30	30	30	30	30	0	0	0	0	0	772	640	540	330	180	2230	1220	920	720	420
Lakshmi Naruka	47	F	Married	NIL	Diabetes	Newly Dignose	1300	Tab Exermet ,Tab Cyra 20 ,Tab Mirbeg-S	No	Yes	Yes	No	151	72	23.5	134	80	160	241	6.8	No	No	No	No	0	0	0	0	0	30	30	30	30	30	0	0	0	0	0	1890	836	647	414	226	2530	1400	1220	1020	920
Rimi Dixit	40	F	Married	12000	Diabetes	Newly Dignose	1500	Tab Sitara -DM ,Cap lntenerve ,Tab cipler	No	No	No	Yes	148	65	24.1	132	79	138	220	6.9	No	No	No	No	0	0	0	0	0	30	30	30	30	30	0	0	0	0	0	1620	825	470	325	180	2230	1100	1020	920	720
Savita Sehgal	51	F	Married	NIL	Diabetes	Newly Dignose	1500	Tab Sitabite -M ,Tab Pregator ,Tab CyreD	No	No	No	Yes	148	48	23.6	125	80	125	257	7.5	No	No	No	No	0	0	0	0	0	30	30	30	30	30	0	0	0	0	0	180	180	180	180	180	2830	1220	1100	1020	720
Rajaram singh	57	M	Married	17000	Diabetes	Newly Dignose	1500	T. Dapanorm m 500/10, T.Glycomet GP 1	No	No	No	Yes	161	79	22.5	128	81	140	218	7.6	No	No	No	No	0	0	0	0	0	30	30	30	30	30	0	0	0	0	0	1158	740	516	330	180	2830	1100	1020	920	920
Mayraj Alam	47	M	Married	13000	Diabetes	Newly Dignose	1550	T. Dapanorm trio (10/100/300), T. Revelol(25), T. Exermel 500mg	No	No	No	Yes	157	68	23.4	134	80	162	232	8.3	No	No	No	No	0	0	0	0	0	30	30	30	30	30	0	0	0	0	0	4223	2530	1056	646	220	2230	1020	920	720	420
Mohd.Sohel	42	M	Married	8000	Diabetes	Newly Dignose	1200	T. Glimfirst MV2	No	No	No	Yes	159	75	22.8	132	81	137	247	8.7	No	No	No	No	0	0	0	0	0	30	30	30	30	30	0	0	0	0	0	2700	1078	716	330	180	2230	1020	1020	920	720
Hina khan	39	F	Married	NIL	Diabetes	Newly Dignose	1360	T. Glimfirst MV2, T. Dolo 650, T. Cloze 0.25mg	No	Yes	No	Yes	145	54	23.9	125	79	156	264	8.1	No	No	No	No	0	0	0	0	0	30	30	30	30	30	0	0	0	0	0	1608	816	515	385	226	2530	1400	1100	920	720
Bhanu Pratab	57	M	Married	11000	Diabetes	Newly Dignose	1500	T. Glimfirst MV2, T. Cloze 0.25mg	No	No	Yes	No	157	60	23.4	126	80	129	255	7.8	No	No	No	No	0	0	0	0	0	30	30	30	30	30	0	0	0	0	0	5336	3427	986	512	254	2230	1100	920	1020	920
Salma begum	52	F	Married	4800	Diabetes	Newly Dignose	1600	T. Deben MR, Cap. Rabitis DRS, T. Gabaneuron NT	No	No	Yes	No	150	49	23.7	134	81	167	278	7.5	No	No	No	No	0	0	0	0	0	30	30	30	30	30	0	0	0	0	0	4223	2094	970	585	268	2530	1400	1100	920	720
Rani singh	45	F	Married	NIL	Diabetes	Newly Dignose	1250	Tab Sitabite M 50/500,Tab Pregator75,Tab Clre D	No	No	No	Yes	156	53	22.1	128	81	152	308	6.9	No	No	No	No	0	0	0	0	0	30	30	30	30	30	0	0	0	0	0	1530	1068	850	330	225	2530	1400	1100	920	720
Sara begum	41	F	Married	NIL	Diabetes	Newly Dignose	1300	Tab nertri 8,Cap Intenerve,Tab Caldan	No	Yes	No	Yes	152	62	22.6	130	79	134	274	6.1	No	No	No	No	0	0	0	0	0	30	30	30	30	30	0	0	0	0	0	1068	740	645	414	180	2530	1400	1220	920	420
Sania Agrawal	46	F	Married	NIL	Diabetes	Newly Dignose	1360	Tab Glufirst 2mg,Tab Dapanorm Trio,Tab Exermet500mg,CaldamM2,Tab Revelol25mg	No	No	No	Yes	149	74	23.4	135	79	148	245	7.1	No	No	No	No	0	0	0	0	0	30	30	30	30	30	0	0	0	0	0	1158	975	740	540	330	2230	1100	1020	720	420
Haarun Mustafa	55	M	Married	19000	Diabetes	Newly Dignose	1500	Tab Glufirst -GV-2,Tab Dapasaen-S,Tab Intenerve,Tab -,Rosuless F,Tab Insart-CC,Cap Rabysam	No	No	Yes	No	162	68	23.8	124	80	124	311	7.4	No	No	No	No	0	0	0	0	0	30	30	30	30	30	0	0	0	0	0	2700	1156	775	386	225	2530	1400	1100	1020	720
Imraan ali	50	M	Married	18500	Diabetes	Newly Dignose	1500	Tab Galvus Met 50/500,Tab Udapa,Tab pregab,Tab Meganeuron	No	No	No	Yes	165	70	24.6	128	80	165	315	7.1	No	No	No	No	0	0	0	0	0	30	30	30	30	30	0	0	0	0	0	1543	716	478	345	180	2530	1520	1220	1020	720
Niranjan kumar	46	M	Married	7000	Diabetes	Newly Dignose	1400	Tab Sitacip-M ,TabThyronorm ,Cap Intenerve	No	No	No	Yes	160	59	22.5	131	80	140	262	8.1	No	No	No	No	0	0	0	0	0	30	30	30	30	30	0	0	0	0	0	3086	1985	717	330	180	3130	2530	2230	1100	420
Afreen begum	52	F	Married	7000	Diabetes	Newly Dignose	1550	Glycohale-FB ,Tab Dupent 40mg ,Syp Dupent-Gel,TabCTD-T 6.25mg ,Cap Ecosprin-AV,Tab Exermet SR	No	No	Yes	No	142	50	25.05	120	79	128	238	7.2	No	No	No	No	0	0	0	0	0	30	30	30	30	30	0	0	0	0	0	9489	7057	4246	1105	725	2830	1220	1100	920	420
Hajira begum	54	F	Married	NIL	Diabetes	Newly Dignose	1500	Tab Glufirst GV-2	No	No	No	Yes	147	66	23.1	127	81	161	279	6.1	No	No	No	No	0	0	0	0	0	30	30	30	30	30	0	0	0	0	0	180	180	180	180	180	2530	1400	1100	1100	720
Shabban Ahmed	50	M	Married	15000	Diabetes	Newly Dignose	1500	Tab GlufirstGU 2 ,Tab Sitabite50/500 ,Tab cloze0.25mg	No	No	No	Yes	161	65	24.6	135	79	155	245	7.1	No	No	No	No	0	0	0	0	0	30	30	30	30	30	0	0	0	0	0	2572	1015	648	330	180	2530	1400	1220	720	420
Shivam Mishra	53	M	Married	12000	Diabetes	Newly Dignose	1550	Tab Daporm trio 500mg	No	No	No	Yes	163	83	22.9	134	80	139	315	6.9	No	No	No	No	0	0	0	0	0	30	30	30	30	30	0	0	0	0	0	4179	2215	945	414	180	2530	1400	1020	920	720
Naseeruddin	48	M	Married	18000	Diabetes	Newly Dignose	1500	Tab Uysov -M ,Tab Udapa	No	No	No	Yes	159	57	21.9	129	81	126	288	7.4	No	No	No	No	0	0	0	0	0	30	30	30	30	30	0	0	0	0	0	2160	985	516	325	200	2530	1400	1220	920	920
Atikah begum	57	F	Married	NIL	Diabetes	Newly Dignose	1300	Tab Gylcomet SR	No	No	No	Yes	145	75	23.7	120	80	147	241	6.9	No	No	No	No	0	0	0	0	0	30	30	30	30	30	0	0	0	0	0	1543	678	370	377	180	2530	1220	1100	1100	720
Abdul Rashid	53	M	Married	9000	Diabetes	Newly Dignose	1260	Tab Glizid -M, Tab Vidolgo -M ,Tab Amlong	No	No	No	Yes	157	74	22.5	127	80	159	225	6.7	No	No	No	No	0	0	0	0	0	30	30	30	30	30	0	0	0	0	0	1068	563	414	225	180	2530	1400	1020	1020	720
Jameel idarshi	54	M	Married	14000	Diabetes	Newly Dignose	1400	Tab Cyra	No	No	Yes	No	160	55	24.1	125	80	136	302	6.8	No	No	No	No	0	0	0	0	0	30	30	30	30	30	0	0	0	0	0	1608	870	575	347	220	2530	1400	1100	920	920
Faaruq	41	M	Married	11000	Diabetes	Newly Dignose	1300	T. Dapanorm m 500/10, T.Glycomet GP 1	No	No	No	Yes	166	70	23.5	132	80	125	293	7.5	No	No	No	No	0	0	0	0	0	30	30	30	30	30	0	0	0	0	0	9515	5325	2576	670	330	2230	920	1020	720	420
Daleela begum	45	F	Married	9000	Diabetes	Newly Dignose	1500	T. Dapanorm trio (10/100/300), T. Revelol(25), T. Exermel 500mg	No	No	No	Yes	150	48	23.9	128	79	148	251	7.7	No	No	No	No	0	0	0	0	0	30	30	30	30	30	0	0	0	0	0	2443	1205	685	378	225	2830	1100	1020	720	920
Ahaan Mujeeb	52	M	Married	16000	Diabetes	Newly Dignose	1500	T. Glimfirst MV2	No	No	No	Yes	162	78	23.1	130	81	144	236	7.9	No	No	No	No	0	0	0	0	0	30	30	30	30	30	0	0	0	0	0	2778	1530	814	525	330	2530	1400	1100	920	720
Shakeel Ahmed	55	M	Married	10000	Diabetes	Newly Dignose	1500	T. Glimfirst MV2, T. Dolo 650, T. Cloze 0.25mg	No	No	Yes	No	159	64	22.8	122	79	132	265	7.1	No	No	No	No	0	0	0	0	0	30	30	30	30	30	0	0	0	0	0	2379	1046	725	414	270	2530	1400	1100	920	720
Virendra gautum	42	M	Married	13500	Diabetes	Newly Dignose	1250	T. Glimfirst MV2, T. Cloze 0.25mg	No	No	No	Yes	157	62	24.3	128	81	137	280	7.6	No	No	No	No	0	0	0	0	0	30	30	30	30	30	0	0	0	0	0	180	180	180	180	180	2530	1400	1020	1020	920
Gulaam Mustafa	60	M	Married	10000	Diabetes	Newly Dignose	1500	T. Deben MR, Cap. Rabitis DRS, T. Gabaneuron NT	No	No	No	Yes	162	57	24.5	134	81	130	316	7.5	No	No	No	No	0	0	0	0	0	30	30	30	30	30	0	0	0	0	0	1158	1068	540	330	180	2530	1400	1100	920	720
komal Katiyar	45	F	Married	NIL	Diabetes	Newly Dignose	1500	Tab Sitabite M 50/500,Tab Pregator75,Tab Clre D	No	No	No	Yes	148	55	24.1	122	81	138	219	6.9	No	No	No	No	0	0	0	0	0	30	30	30	30	30	0	0	0	0	0	5325	2645	1324	803	345	2230	1220	1020	720	420
Sanaya begum	42	F	Married	7500	Diabetes	Newly Dignose	1200	Tab nertri 8,Cap Intenerve,Tab Caldan	No	No	No	Yes	143	46	25.03	134	79	129	245	8.4	No	No	No	No	0	0	0	0	0	30	30	30	30	30	0	0	0	0	0	1620	1003	525	378	226	2230	1100	920	420	420
Daiba begum	47	F	Married	NIL	Diabetes	Newly Dignose	1260	Tab Glufirst 2mg,Tab Dapanorm Trio,Tab Exermet500mg,CaldamM2,Tab Revelol25mg	No	No	No	Yes	145	60	22.5	125	81	125	274	7.4	No	No	No	No	0	0	0	0	0	30	30	30	30	30	0	0	0	0	0	2700	1090	647	405	236	3130	2530	1520	1200	420
Rambriksh Bharti	50	M	Married	5000	Diabetes	Newly Dignose	1400	Tab Glufirst -GV-2,Tab Dapasaen-S,Tab Intenerve,Tab -,Rosuless F,Tab Insart-CC,Cap Rabysam	No	Yes	No	Yes	160	80	23.6	136	80	135	227	7.7	No	No	No	No	0	0	0	0	0	30	30	30	30	30	0	0	0	0	0	4223	2307	1038	516	330	2830	1400	1100	920	720
Aman kumar	51	M	Married	13000	Diabetes	Newly Dignose	1500	Tab Galvus Met 50/500,Tab Udapa,Tab pregab,Tab Meganeuron	No	No	No	Yes	155	72	24.8	128	80	147	305	8.1	No	No	No	No	0	0	0	0	0	30	30	30	30	30	0	0	0	0	0	1158	890	634	425	180	2530	1400	1220	1020	920
Mohd. Sahil	54	M	Married	17000	Diabetes	Newly Dignose	1550	Tab Sitacip-M ,TabThyronorm ,Cap Intenerve	No	No	Yes	No	161	78	22.1	128	80	155	317	7.6	No	No	No	No	0	0	0	0	0	30	30	30	30	30	0	0	0	0	0	180	180	180	180	180	2230	1100	920	1020	720
Shoyl Khan	46	M	Married	14500	Diabetes	Newly Dignose	1400	Glycohale-FB ,Tab Dupent 40mg ,Syp Dupent-Gel,TabCTD-T 6.25mg ,Cap Ecosprin-AV,Tab Exermet SR	No	No	No	Yes	158	65	23.1	134	79	142	285	7.4	No	No	No	No	0	0	0	0	0	30	30	30	30	30	0	0	0	0	0	9489	5916	2268	1084	455	2530	1220	1220	1020	920
Roji begum	42	F	Married	8500	Diabetes	Newly Dignose	1300	Tab Glufirst GV-2	No	No	No	Yes	148	82	23.8	130	79	131	240	7.6	No	No	No	No	0	0	0	0	0	30	30	30	30	30	0	0	0	0	0	2700	1525	925	616	330	2230	1100	920	720	420
Amayra begum	48	F	Married	3000	Diabetes	Newly Dignose	1350	Tab GlufirstGU 2 ,Tab Sitabite50/500 ,Tab cloze0.25mg	No	No	No	Yes	152	76	22.7	124	79	148	268	7.1	No	No	No	No	0	0	0	0	0	30	30	30	30	30	0	0	0	0	0	1068	836	620	414	330	2230	1100	1020	720	720
Punnet Shukla	56	M	Married	15000	Diabetes	Newly Dignose	1500	Tab Daporm trio 500mg	No	No	No	Yes	160	76	24.6	129	79	127	277	7.4	No	No	No	No	0	0	0	0	0	30	30	30	30	30	0	0	0	0	0	2160	1045	615	425	220	2530	1400	1020	1020	720
Priya Dwivedi	45	F	Married	NIL	Diabetes	Newly Dignose	1500	Tab Uysov -M ,Tab Udapa	No	No	Yes	No	155	83	24.1	134	80	121	245	6.5	No	No	No	No	0	0	0	0	0	30	30	30	30	30	0	0	0	0	0	4179	2550	1014	617	270	2530	1400	1220	1020	720
Salman	45	M	Married	10000	Diabetes	Newly Dignose	1500	Tab Gylcomet SR	No	No	No	Yes	159	70	22.2	125	81	158	230	7	No	No	No	No	0	0	0	0	0	30	30	30	30	30	0	0	0	0	0	1620	916	556	405	240	2530	1400	1220	1220	1020
Sabir khan	53	M	Married	18000	Diabetes	Newly Dignose	1550	Tab Glizid -M, Tab Vidolgo -M ,Tab Amlong	No	No	No	Yes	157	62	23.5	127	81	130	224	7.1	No	No	No	No	0	0	0	0	0	30	30	30	30	30	0	0	0	0	0	1530	1158	749	483	180	2230	1100	1020	720	720
Ayman Ahemad	48	M	Married	12000	Diabetes	Newly Dignose	1400	Tab Cyra	No	No	Yes	No	163	56	23.8	132	81	145	278	6.5	No	No	No	No	0	0	0	0	0	30	30	30	30	30	0	0	0	0	0	2700	1347	905	578	325	2230	1020	920	920	720
Salih	50	M	Married	20000	Diabetes	Newly Dignose	1500	T. Glimfirst MV2	No	No	No	Yes	160	60	23.1	134	81	128	292	7	No	No	No	No	0	0	0	0	0	30	30	30	30	30	0	0	0	0	0	2392	1025	645	375	225	2230	1220	920	720	720
Mohd Raqib	46	M	Married	16000	Diabetes	Newly Dignose	1300	Tab GlufirstGU 2 ,Tab Sitabite50/500 ,Tab cloze0.25mg	No	No	No	Yes	155	65	23.3	131	79	134	235	7.5	No	No	No	No	0	0	0	0	0	30	30	30	30	30	0	0	0	0	0	772	640	414	226	180	2530	1400	1020	1100	720
Sonawati pal	47	F	Married	NIL	Diabetes	Newly Dignose	1250	Tab Gylcomet SR	No	No	No	Yes	149	80	22.4	126	80	125	218	7	No	No	No	No	0	0	0	0	0	30	30	30	30	30	0	0	0	0	0	180	180	180	180	180	2530	1400	1220	1100	920
Laxman kumar	54	M	Married	14000	Diabetes	Newly Dignose	1600	Tab Gylcomet SR	No	No	No	Yes	159	57	21.9	123	81	138	306	7.4	No	No	No	No	0	0	0	0	0	30	30	30	30	30	0	0	0	0	0	180	180	180	180	180	2530	1400	1100	920	720
Rahemat Ali	50	M	Married	15000	Diabetes	Newly Dignose	1500	Tab Glizid -M, Tab Vidolgo -M ,Tab Amlong	No	No	Yes	No	161	74	23.5	127	81	142	248	7	No	No	No	No	0	0	0	0	0	30	30	30	30	30	0	0	0	0	0	180	180	180	180	180	2230	1020	920	1020	920
Alok trivedi	44	M	Married	10000	Diabetes	Newly Dignose	1500	Tab Gylcomet SR	No	No	No	Yes	157	58	24.3	135	81	155	290	7	No	No	No	No	0	0	0	0	0	30	30	30	30	30	0	0	0	0	0	2443	1130	617	414	250	2230	1100	1020	720	420
Umraan begum	43	F	Married	NIL	Diabetes	Newly Dignose	1550	Tab GlufirstGU 2 ,Tab Sitabite50/500 ,Tab cloze0.25mg	No	Yes	No	Yes	151	47	22.8	134	79	129	307	7.1	No	No	No	No	0	0	0	0	0	30	30	30	30	30	0	0	0	0	0	1068	750	414	330	180	2530	1400	1220	1220	1020
Irfaan	53	M	Married	13000	Diabetes	Newly Dignose	1600	T. Dapanorm m 500/10, T.Glycomet GP 1	No	No	No	Yes	155	63	23.1	124	80	164	245	7	No	No	No	No	0	0	0	0	0	30	30	30	30	30	0	0	0	0	0	1543	742	440	375	225	2530	1400	1220	920	720
Chandrashekar Singh	57	M	Married	17000	Diabetes	Newly Dignose	1600	T. Dapanorm trio (10/100/300), T. Revelol(25), T. Exermel 500mg	No	No	No	Yes	158	64	22.4	137	80	160	260	7	No	No	No	No	0	0	0	0	0	30	30	30	30	30	0	0	0	0	0	4223	2215	935	425	226	2530	1520	1220	1020	720
Ratan Lal	50	M	Married	9000	Diabetes	Newly Dignose	1500	T. Glimfirst MV2	No	No	No	Yes	157	82	23.5	133	79	157	234	7.9	No	No	No	No	0	0	0	0	0	30	30	30	30	30	0	0	0	0	0	2778	1715	875	530	226	3130	2230	1520	1220	420
Uma Devi	46	F	Married	6050	Diabetes	Newly Dignose	1450	T. Glimfirst MV2, T. Dolo 650, T. Cloze 0.25mg	No	No	No	Yes	150	68	24.7	135	80	135	294	7.1	No	No	No	No	0	0	0	0	0	30	30	30	30	30	0	0	0	0	0	1158	836	726	414	240	2530	1520	1220	1020	720
Tamim Rja	51	M	Married	12000	Diabetes	Newly Dignose	1300	T. Glimfirst MV2, T. Cloze 0.25mg	No	No	No	Yes	160	75	24.2	128	81	146	277	7.4	No	No	No	No	0	0	0	0	0	30	30	30	30	30	0	0	0	0	0	180	180	180	180	180	2830	1400	1220	1100	1020
Imraan	47	M	Married	15000	Diabetes	Newly Dignose	1400	T. Deben MR, Cap. Rabitis DRS, T. Gabaneuron NT	No	No	Yes	No	165	53	22.9	121	81	140	239	6.9	No	No	No	No	0	0	0	0	0	30	30	30	30	30	0	0	0	0	0	772	640	414	330	180	2530	1520	920	1220	1020
Maqsood	45	M	Married	8000	Diabetes	Newly Dignose	1250	Tab Sitabite M 50/500,Tab Pregator75,Tab Clre D	No	No	Yes	No	157	75	23.4	125	79	148	225	7.1	No	No	No	No	0	0	0	0	0	30	30	30	30	30	0	0	0	0	0	2392	1227	723	414	226	2530	1220	1220	1020	720
Aliya begum	38	F	Married	NIL	Diabetes	Newly Dignose	1500	Tab nertri 8,Cap Intenerve,Tab Caldan	No	No	No	Yes	154	85	23.5	120	80	165	268	7.5	No	No	No	No	0	0	0	0	0	30	30	30	30	30	0	0	0	0	0	5323	3014	976	414	250	2230	1220	1100	720	420
Fahimaa begum	40	F	Married	NIL	Diabetes	Newly Dignose	1250	Tab Glufirst 2mg,Tab Dapanorm Trio,Tab Exermet500mg,CaldamM2,Tab Revelol25mg	No	No	No	Yes	147	72	24.5	126	79	142	260	7.2	No	No	No	No	0	0	0	0	0	30	30	30	30	30	0	0	0	0	0	1620	863	478	325	180	2530	1400	1100	920	920
Naseer Ali	49	M	Married	14000	Diabetes	Newly Dignose	1500	Tab Glufirst -GV-2,Tab Dapasaen-S,Tab Intenerve,Tab -,Rosuless F,Tab Insart-CC,Cap Rabysam	No	No	No	Yes	161	59	22.1	134	81	134	247	6.1	No	No	No	No	0	0	0	0	0	30	30	30	30	30	0	0	0	0	0	180	180	180	180	180	2230	1220	1100	1020	720
Prahlaad	55	M	Married	19000	Diabetes	Newly Dignose	1600	Tab Galvus Met 50/500,Tab Udapa,Tab pregab,Tab Meganeuron	No	No	No	Yes	155	60	22.9	132	79	125	264	6.9	No	No	No	No	0	0	0	0	0	30	30	30	30	30	0	0	0	0	0	2469	1040	516	325	180	2530	1220	1220	920	720
Kunaal Agarwal	47	M	Married	7000	Diabetes	Newly Dignose	1200	Tab Sitacip-M ,TabThyronorm ,Cap Intenerve	No	No	Yes	No	163	48	25.02	136	80	128	299	7	No	No	No	No	0	0	0	0	0	30	30	30	30	30	0	0	0	0	0	2700	1245	816	414	226	2530	1400	1400	920	920
Shivam Bansal	53	M	Married	12000	Diabetes	Newly Dignose	1500	Glycohale-FB ,Tab Dupent 40mg ,Syp Dupent-Gel,TabCTD-T 6.25mg ,Cap Ecosprin-AV,Tab Exermet SR	No	No	No	Yes	159	61	24.1	127	80	140	305	8.1	No	No	No	No	0	0	0	0	0	30	30	30	30	30	0	0	0	0	0	1608	785	524	330	180	2530	1400	1100	920	720
Rani devi	51	F	Married	8000	Diabetes	Newly Dignose	1500	Tab Glufirst GV-2	No	No	No	Yes	152	69	23.5	125	80	152	286	6.9	No	No	No	No	0	0	0	0	0	30	30	30	30	30	0	0	0	0	0	1158	1015	920	330	180	2530	1400	1020	1020	920
Somana begum	47	F	Married	11000	Diabetes	Newly Dignose	1450	Tab GlufirstGU 2 ,Tab Sitabite50/500 ,Tab cloze0.25mg	No	No	Yes	No	148	42	23.1	134	80	143	253	7.1	No	No	No	No	0	0	0	0	0	30	30	30	30	30	0	0	0	0	0	9515	5689	3856	836	540	2230	1100	1020	920	720
Dilaabar Sheikh	58	M	Married	16000	Diabetes	Newly Dignose	1550	Tab Daporm trio 500mg	No	No	No	Yes	158	55	22.6	125	80	131	264	7.1	No	No	No	No	0	0	0	0	0	30	30	30	30	30	0	0	0	0	0	720	540	330	330	180	2230	1400	1220	1020	720
Atik Ali	43	M	Married	10000	Diabetes	Newly Dignose	1500	Tab Uysov -M ,Tab Udapa	No	Yes	No	Yes	156	83	22.3	130	80	158	219	7.4	No	No	No	No	0	0	0	0	0	30	30	30	30	30	0	0	0	0	0	1530	1225	986	540	330	2530	1400	1020	1020	720
Najma begum	50	F	Married	NIL	Diabetes	Newly Dignose	1500	Tab Gylcomet SR	No	No	No	Yes	145	65	24.3	131	80	166	275	7.8	No	No	No	No	0	0	0	0	0	30	30	30	30	30	0	0	0	0	0	180	180	180	180	180	2530	1400	1020	920	720
Hasim Idrisi	46	M	Married	14000	Diabetes	Newly Dignose	1400	Tab Glizid -M, Tab Vidolgo -M ,Tab Amlong	No	Yes	No	Yes	160	64	22.4	134	80	123	303	7.5	No	No	No	No	0	0	0	0	0	30	30	30	30	30	0	0	0	0	0	4179	2300	968	525	210	3130	2230	1520	1100	720
Abu bakr	42	M	Married	16000	Diabetes	Newly Dignose	1300	Tab Cyra	No	No	No	Yes	158	53	23.6	127	81	150	227	7.9	No	No	No	No	0	0	0	0	0	30	30	30	30	30	0	0	0	0	0	3086	1845	625	325	180	2230	1020	920	720	420
Qasim Khan	54	M	Married	14500	Diabetes	Newly Dignose	1500	T. Glimfirst MV2	No	No	Yes	No	162	55	22.8	128	79	142	298	7.1	No	No	No	No	0	0	0	0	0	30	30	30	30	30	0	0	0	0	0	180	180	180	180	180	2230	1020	920	720	420
Suraj Bhan	47	M	Married	8000	Diabetes	Newly Dignose	1400	Tab GlufirstGU 2 ,Tab Sitabite50/500 ,Tab cloze0.25mg	No	No	No	Yes	165	62	23.7	122	80	158	307	7.9	No	No	No	No	0	0	0	0	0	30	30	30	30	30	0	0	0	0	0	2392	985	525	330	180	2230	1020	1020	720	420
Mohd Saariq	52	M	Married	15000	Diabetes	Newly Dignose	1500	Tab Gylcomet SR	No	No	No	Yes	163	70	24.1	134	80	135	316	7.4	No	No	No	No	0	0	0	0	0	30	30	30	30	30	0	0	0	0	0	1068	836	530	414	225	2530	1400	1220	920	920
Sarfaroz	45	M	Married	12000	Diabetes	Newly Dignose	1300	Tab Gylcomet SR	No	No	No	Yes	158	66	24.5	130	80	125	235	7.4	No	No	No	No	0	0	0	0	0	30	30	30	30	30	0	0	0	0	0	2160	1125	527	378	226	2830	1220	1100	920	720
Rashid Khan	49	M	Married	7000	Diabetes	Newly Dignose	1400	Tab Glizid -M, Tab Vidolgo -M ,Tab Amlong	No	No	No	Yes	160	73	23.6	124	79	154	248	7.5	No	No	No	No	0	0	0	0	0	30	30	30	30	30	0	0	0	0	0	180	180	180	180	180	2530	1400	1220	920	720
Heena begum	44	F	Married	NIL	Diabetes	Newly Dignose	1500	Tab Gylcomet SR	No	No	No	Yes	142	70	24.3	129	80	127	258	6.9	No	No	No	No	0	0	0	0	0	30	30	30	30	30	0	0	0	0	0	1543	1015	556	385	257	2530	1400	1220	920	720
Gafar Ali	50	M	Married	19500	Diabetes	Newly Dignose	1500	Tab GlufirstGU 2 ,Tab Sitabite50/500 ,Tab cloze0.25mg	No	No	No	Yes	162	58	22.8	131	80	139	291	6.6	No	No	No	No	0	0	0	0	0	30	30	30	30	30	0	0	0	0	0	4223	1973	864	330	180	2230	1100	1020	720	720
Himanshu singh	46	M	Married	14000	Diabetes	Newly Dignose	1500	T. Glimfirst MV2	No	No	Yes	No	160	56	22.9	127	80	130	276	6.9	No	No	No	No	0	0	0	0	0	30	30	30	30	30	0	0	0	0	0	2443	1146	656	420	226	2230	720	920	720	720
Ibrahim Ahemad	54	M	Married	16000	Diabetes	Newly Dignose	1300	T. Dapanorm m 500/10, T.Glycomet GP 1	No	No	No	Yes	160	74	23.5	125	80	148	300	6.8	No	No	No	No	0	0	0	0	0	30	30	30	30	30	0	0	0	0	0	180	180	180	180	180	2230	920	1020	720	720
Divya Agarwal	40	F	Married	7000	Diabetes	Newly Dignose	1200	T. Dapanorm trio (10/100/300), T. Revelol(25), T. Exermel 500mg	No	No	No	Yes	146	77	23.1	133	81	155	276	6.9	No	No	No	No	0	0	0	0	0	30	30	30	30	30	0	0	0	0	0	2778	1445	716	353	180	2530	1220	1100	1020	920
Ajun kumar	48	M	Married	10000	Diabetes	Newly Dignose	1400	T. Glimfirst MV2	No	Yes	No	Yes	157	59	24.5	131	80	132	295	7.2	No	No	No	No	0	0	0	0	0	30	30	30	30	30	0	0	0	0	0	5325	2325	1014	534	180	2530	1400	1220	920	420
Mariam Begum	42	F	Married	NIL	Diabetes	Newly Dignose	1300	T. Glimfirst MV2, T. Dolo 650, T. Cloze 0.25mg	No	No	No	Yes	150	61	22.9	137	79	153	317	7.1	No	No	No	No	0	0	0	0	0	30	30	30	30	30	0	0	0	0	0	2456	1078	625	330	180	2530	1400	1220	920	720
Javed Ali	56	M	Married	18000	Diabetes	Newly Dignose	1500	T. Glimfirst MV2, T. Cloze 0.25mg	No	No	No	Yes	158	63	23.4	138	79	128	228	6.9	No	No	No	No	0	0	0	0	0	30	30	30	30	30	0	0	0	0	0	1620	850	425	270	180	2530	1400	1220	920	720
Wahib	44	M	Married	8000	Diabetes	Newly Dignose	1500	T. Deben MR, Cap. Rabitis DRS, T. Gabaneuron NT	No	No	No	Yes	155	85	23.8	129	79	146	264	6.6	No	No	No	No	0	0	0	0	0	30	30	30	30	30	0	0	0	0	0	1158	926	740	441	265	2230	1020	720	420	420
M Azees	53	M	Married	15000	Diabetes	Newly Dignose	1500	Tab Sitabite M 50/500,Tab Pregator75,Tab Clre D	No	No	No	Yes	162	78	23.2	134	80	122	278	7.1	No	No	No	No	0	0	0	0	0	30	30	30	30	30	0	0	0	0	0	1608	770	556	325	180	2530	1400	1100	1020	720
Mohd Maajid	58	M	Married	17000	Diabetes	Newly Dignose	1500	Tab nertri 8,Cap Intenerve,Tab Caldan	No	No	Yes	No	164	71	21.9	125	81	135	267	6.9	No	No	No	No	0	0	0	0	0	30	30	30	30	30	0	0	0	0	0	2778	1605	825	475	316	2830	1520	1220	1100	1020
Ankit Batham	45	M	Married	10000	Diabetes	Newly Dignose	1400	Tab Glufirst 2mg,Tab Dapanorm Trio,Tab Exermet500mg,CaldamM2,Tab Revelol25mg	No	No	No	Yes	160	63	23.4	132	79	165	225	7.9	No	No	No	No	0	0	0	0	0	30	30	30	30	30	0	0	0	0	0	1530	986	540	330	180	2530	1400	1520	920	720
Munni devi	48	F	Married	NIL	Diabetes	Newly Dignose	1200	Tab Glufirst -GV-2,Tab Dapasaen-S,Tab Intenerve,Tab -,Rosuless F,Tab Insart-CC,Cap Rabysam	No	No	No	Yes	154	86	25.04	124	81	147	290	7.2	No	No	No	No	0	0	0	0	0	30	30	30	30	30	0	0	0	0	0	9000	7342	4056	1148	574	2530	1520	1100	920	720
Rakesh Singh	54	M	Married	13000	Diabetes	Newly Dignose	1500	Tab Galvus Met 50/500,Tab Udapa,Tab pregab,Tab Meganeuron	No	No	No	Yes	162	56	22.7	126	80	132	277	8.1	No	No	No	No	0	0	0	0	0	30	30	30	30	30	0	0	0	0	0	180	180	180	180	180	2530	1520	1100	1220	720
Omar gul	59	M	Married	18000	Diabetes	Newly Dignose	1500	Tab Sitacip-M ,TabThyronorm ,Cap Intenerve	No	No	No	Yes	158	68	23.4	120	79	158	248	7.1	No	No	No	No	0	0	0	0	0	30	30	30	30	30	0	0	0	0	0	1068	836	640	330	180	2530	1400	1220	920	720
Anurag Yadav	43	M	Married	5000	Diabetes	Newly Dignose	1300	Glycohale-FB ,Tab Dupent 40mg ,Syp Dupent-Gel,TabCTD-T 6.25mg ,Cap Ecosprin-AV,Tab Exermet SR	No	No	No	Yes	157	75	23.1	130	81	130	231	7.4	No	No	No	No	0	0	0	0	0	30	30	30	30	30	0	0	0	0	0	720	614	540	414	220	2230	920	720	720	720
Narendra Singh Yadav	47	M	Married	11000	Diabetes	Newly Dignose	1500	Tab Glufirst GV-2	No	No	Yes	No	163	80	23.9	127	79	154	265	7.1	No	No	No	No	0	0	0	0	0	30	30	30	30	30	0	0	0	0	0	1543	914	414	330	180	2230	1020	920	720	720
Upendra Kumar	39	M	Married	13500	Diabetes	Newly Dignose	1200	Tab GlufirstGU 2 ,Tab Sitabite50/500 ,Tab cloze0.25mg	No	No	Yes	No	165	73	24.1	135	79	145	308	8.1	No	No	No	No	0	0	0	0	0	30	30	30	30	30	0	0	0	0	0	2160	945	515	330	180	2530	1400	1100	920	420
Rahemaan	47	M	Married	5000	Diabetes	Newly Dignose	1500	Tab Daporm trio 500mg	No	No	Yes	No	159	67	23.5	129	80	134	220	7.3	No	No	No	No	0	0	0	0	0	30	30	30	30	30	0	0	0	0	0	180	180	180	180	180	2530	1400	1100	920	720
Sana begum	42	F	Married	12000	Diabetes	Newly Dignose	1350	Tab Uysov -M ,Tab Udapa	No	No	No	Yes	147	82	22.8	122	81	125	285	7.2	No	No	No	No	0	0	0	0	0	30	30	30	30	30	0	0	0	0	0	1530	1068	725	465	213	2230	920	720	920	720
Nizam Ali	40	M	Married	11000	Diabetes	Newly Dignose	1260	Tab Gylcomet SR	No	No	No	Yes	158	65	23.7	125	79	147	223	6.5	No	No	No	No	0	0	0	0	0	30	30	30	30	30	0	0	0	0	0	1620	715	546	330	180	3130	2830	2230	1520	720
Yusuf	56	M	Married	17000	Diabetes	Newly Dignose	1500	Tab Glizid -M, Tab Vidolgo -M ,Tab Amlong	No	No	No	Yes	155	58	24.3	132	80	162	316	6.9	No	No	No	No	0	0	0	0	0	30	30	30	30	30	0	0	0	0	0	2392	1138	675	375	210	2230	720	720	720	720
Geetanjali mishra	42	F	Married	8000	Diabetes	Newly Dignose	1400	Tab Cyra	No	No	No	Yes	149	84	22.5	134	79	141	297	6.6	No	No	No	No	0	0	0	0	0	30	30	30	30	30	0	0	0	0	0	180	180	180	180	180	2530	1220	1220	1100	920
Zohra begum	54	F	Married	NIL	Diabetes	Newly Dignose	1500	T. Glimfirst MV2	No	No	No	Yes	142	73	24.1	132	80	135	274	7.1	No	No	No	No	0	0	0	0	0	30	30	30	30	30	0	0	0	0	0	180	180	180	180	180	2530	1400	1100	1100	1020
Mohd Rehan	58	M	Married	17000	Diabetes	Newly Dignose	1500	Tab GlufirstGU 2 ,Tab Sitabite50/500 ,Tab cloze0.25mg	No	Yes	No	Yes	165	74	23.6	127	81	124	279	7.4	No	No	No	No	0	0	0	0	0	30	30	30	30	30	0	0	0	0	0	540	414	330	330	180	2230	1400	1100	1020	720
Aamir	46	M	Married	10000	Diabetes	Newly Dignose	1400	Tab Gylcomet SR	No	No	No	Yes	160	70	24.5	136	79	136	225	7.1	No	No	No	No	0	0	0	0	0	30	30	30	30	30	0	0	0	0	0	1608	1047	925	526	330	2530	1220	1100	1020	720
Avdhesh kumar	44	M	Married	13000	Diabetes	Newly Dignose	1500	Tab Gylcomet SR	No	No	No	Yes	158	69	25.03	124	79	138	258	7.2	No	No	No	No	0	0	0	0	0	30	30	30	30	30	0	0	0	0	0	3086	1797	670	414	226	2530	1400	1100	1020	720
Santosh pal	50	M	Married	18000	Diabetes	Newly Dignose	1560	Tab Glizid -M, Tab Vidolgo -M ,Tab Amlong	No	No	Yes	No	156	58	22.4	133	80	128	260	7.1	No	No	No	No	0	0	0	0	0	30	30	30	30	30	0	0	0	0	0	2443	1045	545	340	180	2230	1100	1020	720	420
Hameed ali	47	M	Married	15000	Diabetes	Newly Dignose	1500	Tab Gylcomet SR	No	No	No	Yes	158	77	23.8	125	80	135	302	6.6	No	No	No	No	0	0	0	0	0	30	30	30	30	30	0	0	0	0	0	180	180	180	180	180	2530	1520	1220	920	720
Sakib Anshari	52	M	Married	10000	Diabetes	Newly Dignose	1550	Tab GlufirstGU 2 ,Tab Sitabite50/500 ,Tab cloze0.25mg	No	No	No	Yes	162	68	22.7	128	79	146	275	7.9	No	No	No	No	0	0	0	0	0	30	30	30	30	30	0	0	0	0	0	2778	1325	728	316	180	2230	920	720	720	420
													155.606	65.7375	23.3868	129.194	79.95	143.037	267.269	7.17125					0	0	0	0	0	30	30	30	30	30	0	0	0	0	0	1068	740	414	216	180	2530	1220	1220	1100	920
													6.73155	10.9536	0.816181	4.68841	0.812404	13.4396	29.5425	0.500798																				2220.79	1302.99	726.056	391.137	224.213	2481.25	1328.5	1105.12	928.5	704.875
																																								2035.65	1284.8	663.649	172.017	77.3882	234.517	317.546	206.591	158.217	180.066
[truncated: 22 more columns]

## Sheet: Control
Name	Age	Sex (M/F/T)	Marital Status	MONTHLY INCOME	History of present illness	SYMPTOMATIC ENQUIRY	TREATMENT RECEIVED			Family History	Obstetric History	Dietetic History	General Physical Examination								H/O				Costing components
							DIET	DRUGS	INSULIN				HEIGHT (c.m)	WEIGHT (kgs)	BMI	SBP (mmHg)	DBP (mmHg)	FBS	PP	HbA1C	DFU	DN	DPN	IHD/CHF	Hospital visit					Out patient visit					Physician visit					Drugs					Laboratory
FATIMA	42	F	Married	NIL	Diabetes	Newly Dignose	1300	T.Tryptomer 10mg T.Shelcal 500mg Cap.lumia 60k	No	No	Yes	Yes	151	76		127	81	143	229	7.3	No	No	No	No	Baseline	3	6	18	24	Baseline	3	6	18	24	Baseline	3	6	18	24	Baseline	3	6	18	24	Baseline	3	6	18	24
YASHMEEN	40	F	Married	8000	Diabetes	Newly Dignose	1260	T.metpill GB2 T.Vilpower M50/500 T.atchol 20HS	No	No	Yes	Yes	142	62		130	80	160	246	6.5	No	No	No	No	0	0	0	0	0	30	30	30	30	30	0	0	0	0	0	4123	3845	3410	3230	3125	2345	1875	1020	950	527
RUKSANA	45	F	Married	11000	Diabetes	Newly Dignose	1350	Tab.tendia	No	No	Yes	Yes	147	59		133	80	142	265	6.5	No	No	No	No	0	0	0	0	0	30	30	30	30	30	0	0	0	0	0	2459	2262	2068	1740	1458	2435	1545	1295	945	840
MAJID	42	M	Married	17000	Diabetes	Newly Dignose	1470	T.Tryptomer 10mg T.Shelcal 500mg Cap.lumia 60k	No	No	No	Yes	157	68		130	81	155	300	7.2	No	No	No	No	0	0	0	0	0	30	30	30	30	30	0	0	0	0	0	2264	2048	1840	1625	1245	2330	1850	1485	1020	710
SAHIL	35	M	Married	32000	Diabetes	Newly Dignose	1350	T.Tryptomer 10mg T.Shelcal 500mg Cap.lumia 60k	No	Yes	No	No	155	72		132	79	165	245	7.6	No	No	No	No	0	0	0	0	0	30	30	30	30	30	0	0	0	0	0	4123	3845	3516	3214	3120	2530	1885	1475	1080	910
AKEEL	48	M	Married	17500	Diabetes	Newly Dignose	1280	Tab. Sitabite M(50/500)	No	No	No	Yes	153	87		132	80	165	236	8.5	No	No	No	No	0	0	0	0	0	30	30	30	30	30	0	0	0	0	0	4225	4015	3807	3337	3248	2540	2075	1560	1256	820
MUSTAFA	42	M	Married	15000	Diabetes	Newly Dignose	1400	T.torglip M50/500	No	Yes	No	Yes	156	71		125	78	140	300	7.8	No	No	No	No	0	0	0	0	0	30	30	30	30	30	0	0	0	0	0	2876	2567	2230	2025	1876	2780	2180	1580	1245	740
LATIFA	36	F	Married	11000	Diabetes	Newly Dignose	1200	T. Exermet 500	No	No	Yes	Yes	145	60		130	81	125	265	7.6	No	No	No	No	0	0	0	0	0	30	30	30	30	30	0	0	0	0	0	2754	2390	2040	1830	1754	2130	1585	1145	1090	840
HIMANSHU	45	M	Married	16000	Diabetes	Newly Dignose	1150	T. Exermet SR 500	No	No	No	Yes	165	67		125	80	152	210	6.6	No	No	No	No	0	0	0	0	0	30	30	30	30	30	0	0	0	0	0	2548	2108	1830	1627	1505	2480	1875	1280	1120	980
PRANSHU	45	M	Married	5000	Diabetes	Newly Dignose	1500	T. Exermet SR 500	No	No	No	No	152	58		130	80	160	280	8.2	No	No	No	No	0	0	0	0	0	30	30	30	30	30	0	0	0	0	0	2190	1955	1680	1340	1190	2150	1565	1220	1050	840
MAYMUNAH	50	M	Married	20000	Diabetes	Newly Dignose	1300	T. Exermet SR 500	No	No	No	Yes	158	56		128	81	157	246	7.5	No	No	No	No	0	0	0	0	0	30	30	30	30	30	0	0	0	0	0	2365	2045	1774	1555	1365	2150	1575	1285	1030	845
HUSAN	42	M	Married	14500	Diabetes	Newly Dignose	1200	Tab. Sitabte M(50/500)	No	No	No	Yes	152	49		138	81	165	266	7.2	No	No	No	No	0	0	0	0	0	30	30	30	30	30	0	0	0	0	0	2265	1895	1580	1360	1165	2260	1650	1180	1060	720
JUNNUT	38	F	Married	NIL	Diabetes	Newly Dignose	1420	T. Exermet SR 500	No	No	Yes	Yes	141	52		125	82	150	302	7.5	No	No	No	No	0	0	0	0	0	30	30	30	30	30	0	0	0	0	0	2835	2467	2118	1958	1835	2130	1550	1195	980	840
LUTFIYAH	50	F	Married	NIL	Diabetes	Newly Dignose	1500	T. Amlong 10mg T.naproxen 500mg T.dupent 40mg	No	No	Yes	Yes	149	74		140	79	130	255	6.5	No	No	No	No	0	0	0	0	0	30	30	30	30	30	0	0	0	0	0	2354	2055	1780	1524	1354	2170	1520	1245	1150	920
SHAJARAH	38	M	Married	9000	Diabetes	Newly Dignose	1200	Cap. Intenarve Tab.Amlopres TL 40mg	No	No	No	No	157	64		135	80	165	312	7.5	No	No	No	No	0	0	0	0	0	30	30	30	30	30	0	0	0	0	0	2430	1995	1705	1264	1430	2130	1620	1180	945	720
NITEESH	62	M	Married	19000	Diabetes	Newly Dignose	1480	Tab.dapavel M(10/500) Tab.Glycomet SR 500	No	No	No	No	158	68		128	80	130	289	7.2	No	No	No	No	0	0	0	0	0	30	30	30	30	30	0	0	0	0	0	2348	1920	1575	1356	1348	2100	1585	1160	985	840
LASHIRAH	50	F	Married	NIL	Diabetes	Newly Dignose	1260	Tab.Torglip M 50/500 Cap.Rejunex CD3	No	No	Yes	Yes	150	65		129	81	145	239	8.1	No	No	No	No	0	0	0	0	0	30	30	30	30	30	0	0	0	0	0	2154	1825	1536	1325	1154	2146	1540	1145	1080	542
OJALA	46	F	Married	15000	Diabetes	Newly Dignose	1300	Tab.UDAPA-S(10X100)X01)Xabf Tab.Glimfirst MV-2xM Tab.Caldan MZ	No	No	Yes	Yes	152	73		128	80	132	315	7.2	No	No	No	No	0	0	0	0	0	30	30	30	30	30	0	0	0	0	0	2704	2420	2146	1925	1705	2230	1575	1185	980	720
SADIQAH	55	M	Married	7000	Diabetes	Newly Dignose	1480	Tab. Dapaturn-M(10x1000)mg Tab.cresar(T.40) Cap.Rozuor-ASP(75/10) Tab.Dolo 650mg Cap.Pass	No	No	No	Yes	151	58		130	81	140	300	7.3	No	No	No	No	0	0	0	0	0	30	30	30	30	30	0	0	0	0	0	5324	4972	4625	4527	4325	2185	1645	1285	1050	850
MUDASIR	65	M	Married	28000	Diabetes	Newly Dignose	1500	Tab Udapa-S T. Glimfirst Mv2	No	No	No	Yes	154	70		140	80	145	290	7.4	No	No	No	No	0	0	0	0	0	30	30	30	30	30	0	0	0	0	0	2387	1935	1705	1506	1387	2156	1575	1150	1040	840
FAISAL	58	M	Married	18000	Diabetes	Newly Dignose	1500	T. Exermet SR 500	No	No	No	Yes	170	60		128	81	120	255	6.7	No	No	No	No	0	0	0	0	0	30	30	30	30	30	0	0	0	0	0	3085	2823	2523	2340	2058	2275	2185	1585	1290	980
ALLEYAH	52	F	Married	NIL	Diabetes	Newly Dignose	1490	Tab. Sitabte M(50/500)	No	Yes	Yes	No	147	50		130	80	155	230	7.4	No	No	No	No	0	0	0	0	0	30	30	30	30	30	0	0	0	0	0	2278	1937	1580	1325	1278	2400	1875	1265	980	840
RAHIM	48	M	Married	6500	Diabetes	Newly Dignose	1600	Tab. Sitabte M(50/500)	No	No	No	Yes	155	47		125	81	122	310	8.6	No	No	No	No	0	0	0	0	0	30	30	30	30	30	0	0	0	0	0	2545	2120	1815	1675	1545	2465	1965	1580	1285	1040
MUNIRA	45	F	Married	15000	Diabetes	Newly Dignose	1500	T. Dupent(40), T. Exermet SR(500), T. CTD-T, Syp. Dupent gel	No	No	Yes	Yes	148	55		130	80	165	260	6.5	No	No	No	No	0	0	0	0	0	30	30	30	30	30	0	0	0	0	0	9482	9047	8740	8603	8482	2495	1845	1220	1020	850
HALEEMA	50	F	Married	NIL	Diabetes	Newly Dignose	1250	T. Exermet SR 500	No	No	Yes	Yes	143	52		125	80	145	315	8.2	No	No	No	No	0	0	0	0	0	30	30	30	30	30	0	0	0	0	0	2771	2435	2140	1914	1771	2185	1865	1540	1350	710
AMAN	45	M	Married	30000	Diabetes	Newly Dignose	1500	T. Dolo 650, T.Torglip m 50/500, T.Amaryl m1	No	No	No	Yes	156	45		122	82	170	249	7.2	No	No	No	No	0	0	0	0	0	30	30	30	30	30	0	0	0	0	0	2812	2520	2125	1905	1812	2165	1675	1130	990	865
ARMAAN	43	M	Married	12000	Diabetes	Newly Dignose	1600	T. Sitacip m 50/500, T . Thyronorm 50	No	No	No	No	165	42		135	79	155	220	8.4	No	No	No	No	0	0	0	0	0	30	30	30	30	30	0	0	0	0	0	2167	1803	1625	1450	1167	2190	1845	1280	1040	845
AHMAD	60	M	Married	16500	Diabetes	Newly Dignose	1600	T. Udapa 10*1, T. Meganeuron*, T. Galvus met(50/500)	No	No	No	Yes	182	62		130	81	150	270	7.5	No	No	No	No	0	0	0	0	0	30	30	30	30	30	0	0	0	0	0	4278	3745	3485	3356	3278	2085	1875	1285	1120	980
AFHAM	52	M	Married	9500	Diabetes	Newly Dignose	1300	T. Glimfirst MV2, T. Dolo 650, T. Cloze 0.25mg	No	No	No	Yes	150	50		135	81	161	280	7.2	No	No	No	No	0	0	0	0	0	30	30	30	30	30	0	0	0	0	0	4123	3760	3445	3227	3123	2285	1765	1275	1100	980
MAHIMA	50	F	Married	NIL	Diabetes	Newly Dignose	1500	T. ONDERO MET 2.5/500mg, T. ELTROXIN 50mg	No	No	Yes	No	140	45		130	80	130	235	8.2	No	No	No	No	0	0	0	0	0	30	30	30	30	30	0	0	0	0	0	2654	2230	2048	1758	1654	2255	1765	1100	980	548
NISHTHA	55	F	Married	NIL	Diabetes	Newly Dignose	1500	T. Dapanorm m 500/10, T.Glycomet GP 1	No	Yes	Yes	Yes	147	76		132	80	146	260	7.2	No	No	No	No	0	0	0	0	0	30	30	30	30	30	0	0	0	0	0	2607	2385	2078	1825	1607	2175	1620	1275	1020	980
JABID	48	M	Married	7500	Diabetes	Newly Dignose	1350	T. Dapanorm trio (10/100/300), T. Revelol(25), T. Exermel 500mg	No	Yes	No	Yes	146	52		128	81	132	308	6.8	No	No	No	No	0	0	0	0	0	30	30	30	30	30	0	0	0	0	0	2847	2445	2114	1925	1847	2190	1820	1375	1175	850
ABID	51	M	Married	13000	Diabetes	Newly Dignose	1500	T. Glimfirst MV2	No	No	No	Yes	158	74		130	80	160	300	7.8	No	No	No	No	0	0	0	0	0	30	30	30	30	30	0	0	0	0	0	2513	2170	1845	1678	1513	2163	1540	1275	1145	980
HIBA	42	F	Married	NIL	Diabetes	Newly Dignose	1260	T. Glimfirst MV2, T. Dolo 650, T. Cloze 0.25mg	No	No	Yes	Yes	143	60		125	80	128	245	6.2	No	No	No	No	0	0	0	0	0	30	30	30	30	30	0	0	0	0	0	2157	1789	1520	1340	1157	2280	1645	1250	1050	875
RAHIM	55	M	Married	17000	Diabetes	Newly Dignose	1450	T. Glimfirst MV2, T. Cloze 0.25mg	No	No	No	Yes	157	68		135	81	140	300	7.5	No	No	No	No	0	0	0	0	0	30	30	30	30	30	0	0	0	0	0	2354	1950	1716	1556	1354	2186	1585	1150	1040	758
TASLIM	47	F	Married	NIL	Diabetes	Newly Dignose	1300	T. Deben MR, Cap. Rabitis DRS, T. Gabaneuron NT	No	No	Yes	Yes	147	57		138	79	145	245	8.5	No	No	No	No	0	0	0	0	0	30	30	30	30	30	0	0	0	0	0	2367	1878	1605	1485	1365	2165	1545	1275	1050	985
KHUSHI	40	F	Married	9000	Diabetes	Newly Dignose	1200	Tab Sitabite M 50/500,Tab Pregator75,Tab Clre D	No	No	Yes	Yes	145	48		128	80	141	255	8.5	No	No	No	No	0	0	0	0	0	30	30	30	30	30	0	0	0	0	0	2532	2205	2040	1855	1532	2185	1660	1275	1100	910
RADHIKA	50	F	Married	7000	Diabetes	Newly Dignose	1400	Tab nertri 8,Cap Intenerve,Tab Caldan	No	No	Yes	Yes	146	65		125	79	135	220	7.8	No	No	No	No	0	0	0	0	0	30	30	30	30	30	0	0	0	0	0	5327	5020	4835	4648	4327	2255	1565	1180	1040	652
HIDAYAH	50	F	Married	11000	Diabetes	Newly Dignose	1600	Tab Glufirst 2mg,Tab Dapanorm Trio,Tab Exermet500mg,CaldamM2,Tab Revelol25mg	No	No	Yes	Yes	142	63		122	80	158	240	8.2	No	No	No	No	0	0	0	0	0	30	30	30	30	30	0	0	0	0	0	2510	2200	1958	1740	1510	2384	1770	1275	920	720
FOZIAH	55	F	Married	18000	Diabetes	Newly Dignose	1600	Tab Glufirst -GV-2,Tab Dapasaen-S,Tab Intenerve,Tab -,Rosuless F,Tab Insart-CC,Cap Rabysam	No	No	Yes	No	146	67		128	80	150	300	6.9	No	No	No	No	0	0	0	0	0	30	30	30	30	30	0	0	0	0	0	2705	2475	2145	1978	1705	2185	1520	1245	1050	845
MISHEL	42	M	Married	5000	Diabetes	Newly Dignose	1250	Tab Galvus Met 50/500,Tab Udapa,Tab pregab,Tab Meganeuron	No	No	No	Yes	160	75		130	81	125	220	7.3	No	No	No	No	0	0	0	0	0	30	30	30	30	30	0	0	0	0	0	2378	2037	1715	1527	1378	2120	1540	1180	1090	985
JASIM	55	M	Married	17000	Diabetes	Newly Dignose	1500	Tab Sitacip-M ,TabThyronorm ,Cap Intenerve	No	Yes	No	Yes	155	71		140	80	140	275	7.4	No	No	No	No	0	0	0	0	0	30	30	30	30	30	0	0	0	0	0	2908	2540	2285	2050	1908	2265	1625	1380	1235	547
YASIR	50	M	Married	11000	Diabetes	Newly Dignose	1500	Glycohale-FB ,Tab Dupent 40mg ,Syp Dupent-Gel,TabCTD-T 6.25mg ,Cap Ecosprin-AV,Tab Exermet SR	No	No	No	Yes	161	83		135	81	155	248	8.3	No	No	No	No	0	0	0	0	0	30	30	30	30	30	0	0	0	0	0	2107	1820	1630	1490	1107	2175	1650	1285	1080	980
KULDEEP SINGH	57	M	Married	18000	Diabetes	Newly Dignose	1560	Tab Glufirst GV-2	No	No	No	Yes	154	78		132	80	145	300	7.2	No	No	No	No	0	0	0	0	0	30	30	30	30	30	0	0	0	0	0	2448	2125	1876	1630	1448	2086	1520	1475	1020	920
ROSHNI	46	F	Married	NIL	Diabetes	Newly Dignose	1250	Tab GlufirstGU 2 ,Tab Sitabite50/500 ,Tab cloze0.25mg	No	No	Yes	No	149	54		135	81	160	295	7.6	No	No	No	No	0	0	0	0	0	30	30	30	30	30	0	0	0	0	0	4224	3840	3562	3415	3228	2175	1645	1295	920	720
MUNNA	49	M	Married	10000	Diabetes	Newly Dignose	1300	Tab Daporm trio 500mg	No	No	No	Yes	156	75		140	80	156	240	8.3	No	No	No	No	0	0	0	0	0	30	30	30	30	30	0	0	0	0	0	2165	1880	1585	1330	1165	2565	2180	1280	1020	850
JASMIN	44	F	Married	10000	Diabetes	Newly Dignose	1420	Tab Uysov -M ,Tab Udapa	No	No	Yes	No	142	80		135	80	128	280	7.4	No	No	No	No	0	0	0	0	0	30	30	30	30	30	0	0	0	0	0	2240	1974	1680	1540	1245	2275	1480	1275	965	845
AMAYA	48	F	Married	8000	Diabetes	Newly Dignose	1250	Tab Gylcomet SR	No	No	Yes	Yes	147	62		128	79	165	255	8.3	No	No	No	No	0	0	0	0	0	30	30	30	30	30	0	0	0	0	0	2725	2458	2245	2125	1745	2175	1560	1165	1025	920
MAYA	55	F	Married	NIL	Diabetes	Newly Dignose	1500	Tab Glizid -M, Tab Vidolgo -M ,Tab Amlong	No	No	Yes	Yes	142	85		135	80	128	235	7.6	No	No	No	No	0	0	0	0	0	30	30	30	30	30	0	0	0	0	0	2893	2505	2225	2035	1837	2180	1685	1375	1235	1040
AFRAH	46	F	Married	NIL	Diabetes	Newly Dignose	1300	Tab Cyra	No	No	Yes	Yes	147	49		140	80	142	280	8.5	No	No	No	No	0	0	0	0	0	30	30	30	30	30	0	0	0	0	0	4279	3978	3620	3417	3278	2190	1830	1480	1265	625
ARVA	45	M	Married	17500	Diabetes	Newly Dignose	1260	Tab Ecosprin	No	No	No	No	165	89		125	80	135	304	8.3	No	No	No	No	0	0	0	0	0	30	30	30	30	30	0	0	0	0	0	9456	8985	8515	8340	8455	2265	1770	1493	1265	1150
RAM GOPAL	55	M	Married	15000	Diabetes	Newly Dignose	1500	Tab Glufirst GV 2 ,Tab Dapsitn	No	No	No	Yes	160	80		128	81	155	315	7.8	No	No	No	No	0	0	0	0	0	30	30	30	30	30	0	0	0	0	0	2672	2345	2078	1845	1647	2170	1885	1375	1180	570
NEHA	45	F	Married	13500	Diabetes	Newly Dignose	1200	Tab Amaryl ,Tab Sitara -M ,Tab Ecosprin AU 75/20	No	No	Yes	Yes	143	72		137	82	165	300	7.2	No	No	No	No	0	0	0	0	0	30	30	30	30	30	0	0	0	0	0	2123	1835	1538	1380	1120	2100	1675	1285	1020	920
RITIKA	45	F	Married	NIL	Diabetes	Newly Dignose	1200	Tab Zomelis-DM	No	No	Yes	Yes	140	50		122	81	125	280	7.8	No	No	No	No	0	0	0	0	0	30	30	30	30	30	0	0	0	0	0	2445	2000	1825	1735	1445	2460	1975	1245	1080	950
BABLU	50	M	Married	25000	Diabetes	Newly Dignose	1350	Tab Zoryl1mg ,Tab Golnus-met 50/100,Tab Preyaba-M,Tab Typomer10	No	No	No	Yes	155	86		130	80	146	255	7.8	No	No	No	No	0	0	0	0	0	30	30	30	30	30	0	0	0	0	0	2771	2440	2220	2030	1775	2165	1750	1480	1250	507
DILEEP	55	M	Married	17000	Diabetes	Newly Dignose	1300	Tab Exermet ,Tab Cyra 20 ,Tab Mirbeg-S	No	Yes	No	No	151	72		135	81	155	245	7.4	No	No	No	No	0	0	0	0	0	30	30	30	30	30	0	0	0	0	0	2865	2436	2145	1914	1857	2245	1550	1165	1065	920
AKBAR	60	M	Married	12000	Diabetes	Newly Dignose	1500	Tab Sitara -DM ,Cap lntenerve ,Tab cipler	No	No	No	Yes	158	65		132	80	140	225	7.4	No	No	No	No	0	0	0	0	0	30	30	30	30	30	0	0	0	0	0	2665	2345	2070	1825	1664	2175	1620	1245	1090	720
KOMAL	45	F	Married	NIL	Diabetes	Newly Dignose	1500	Tab Sitabite -M ,Tab Pregator ,Tab CyreD	No	No	Yes	Yes	142	48		127	81	128	260	7.3	No	No	No	No	0	0	0	0	0	30	30	30	30	30	0	0	0	0	0	2345	2015	1825	1640	1345	2265	1720	1275	1020	845
JUMMAL	58	M	Married	17000	Diabetes	Newly Dignose	1500	T. Dapanorm m 500/10, T.Glycomet GP 1	No	No	No	Yes	161	79		130	80	135	220	7.8	No	No	No	No	0	0	0	0	0	30	30	30	30	30	0	0	0	0	0	2234	1940	1623	1430	1235	2475	2045	1585	1275	985
JASIM	48	M	Married	13000	Diabetes	Newly Dignose	1550	T. Dapanorm trio (10/100/300), T. Revelol(25), T. Exermel 500mg	No	No	No	Yes	157	68		135	81	160	230	8.4	No	No	No	No	0	0	0	0	0	30	30	30	30	30	0	0	0	0	0	4127	3830	3658	3445	3127	2295	1820	1385	1235	1090
FAREED	45	M	Married	8000	Diabetes	Newly Dignose	1200	T. Glimfirst MV2	No	No	No	Yes	159	75		135	80	135	245	8.9	No	No	No	No	0	0	0	0	0	30	30	30	30	30	0	0	0	0	0	2700	2478	2216	2085	1700	2175	1735	1275	1080	875
AQEELAH	35	F	Married	NIL	Diabetes	Newly Dignose	1360	T. Glimfirst MV2, T. Dolo 650, T. Cloze 0.25mg	No	Yes	Yes	Yes	145	54		126	80	155	265	8.2	No	No	No	No	0	0	0	0	0	30	30	30	30	30	0	0	0	0	0	2607	2316	2015	1880	1625	2100	1540	1175	980	720
NUBAID	55	M	Married	11000	Diabetes	Newly Dignose	1500	T. Glimfirst MV2, T. Cloze 0.25mg	No	No	No	No	157	60		130	81	130	260	7.9	No	No	No	No	0	0	0	0	0	30	30	30	30	30	0	0	0	0	0	5236	4927	4657	4412	4235	2185	1540	1180	1020	920
MASARRAT	58	M	Married	4800	Diabetes	Newly Dignose	1600	T. Deben MR, Cap. Rabitis DRS, T. Gabaneuron NT	No	No	No	No	160	49		135	80	165	280	8.2	No	No	No	No	0	0	0	0	0	30	30	30	30	30	0	0	0	0	0	4225	3994	3670	3485	3240	2295	1680	1285	1080	850
DABIR	45	M	Married	26500	Diabetes	Newly Dignose	1250	Tab Sitabite M 50/500,Tab Pregator75,Tab Clre D	No	No	No	Yes	156	53		130	80	150	300	7.4	No	No	No	No	0	0	0	0	0	30	30	30	30	30	0	0	0	0	0	2534	2168	1850	1630	1528	2185	1520	1275	1245	681
HUSNA	41	F	Married	NIL	Diabetes	Newly Dignose	1300	Tab nertri 8,Cap Intenerve,Tab Caldan	No	Yes	Yes	Yes	142	62		132	80	135	280	6.5	No	No	No	No	0	0	0	0	0	30	30	30	30	30	0	0	0	0	0	2168	1940	1665	1425	1165	2195	1745	1375	1150	539
YASIR	46	M	Married	23000	Diabetes	Newly Dignose	1360	Tab Glufirst 2mg,Tab Dapanorm Trio,Tab Exermet500mg,CaldamM2,Tab Revelol25mg	No	No	No	Yes	159	74		136	81	150	246	7.8	No	No	No	No	0	0	0	0	0	30	30	30	30	30	0	0	0	0	0	3054	2875	2540	2340	2035	2180	1645	1280	1175	980
ANOOP	55	M	Married	19000	Diabetes	Newly Dignose	1500	Tab Glufirst -GV-2,Tab Dapasaen-S,Tab Intenerve,Tab -,Rosuless F,Tab Insart-CC,Cap Rabysam	No	No	No	No	162	68		125	81	125	320	8.5	No	No	No	No	0	0	0	0	0	30	30	30	30	30	0	0	0	0	0	2702	2456	2175	1986	1735	2180	1520	1260	1230	549
IJABO	50	F	Married	18500	Diabetes	Newly Dignose	1500	Tab Galvus Met 50/500,Tab Udapa,Tab pregab,Tab Meganeuron	No	No	Yes	Yes	145	70		130	81	166	310	7.6	No	No	No	No	0	0	0	0	0	30	30	30	30	30	0	0	0	0	0	2542	2218	2078	1845	1540	2285	1680	1375	1090	845
MIFTAH	46	F	Married	7000	Diabetes	Newly Dignose	1400	Tab Sitacip-M ,TabThyronorm ,Cap Intenerve	No	No	Yes	Yes	140	59		132	79	145	260	8.4	No	No	No	No	0	0	0	0	0	30	30	30	30	30	0	0	0	0	0	3074	2874	2517	2330	2075	2385	1850	1375	1100	980
FORHANA	52	F	Married	7000	Diabetes	Newly Dignose	1550	Glycohale-FB ,Tab Dupent 40mg ,Syp Dupent-Gel,TabCTD-T 6.25mg ,Cap Ecosprin-AV,Tab Exermet SR	No	No	Yes	No	142	50		122	80	129	240	7.8	No	No	No	No	0	0	0	0	0	30	30	30	30	30	0	0	0	0	0	9465	9107	8956	8605	8432	2275	1545	1265	980	855
LALIT	54	M	Married	32000	Diabetes	Newly Dignose	1500	Tab Glufirst GV-2	No	No	No	Yes	157	66		128	80	160	280	6.8	No	No	No	No	0	0	0	0	0	30	30	30	30	30	0	0	0	0	0	2130	1885	1635	1367	1115	2250	1580	1285	1100	985
TARUN	50	M	Married	15000	Diabetes	Newly Dignose	1500	Tab GlufirstGU 2 ,Tab Sitabite50/500 ,Tab cloze0.25mg	No	No	No	Yes	161	65		132	81	158	240	7.5	No	No	No	No	0	0	0	0	0	30	30	30	30	30	0	0	0	0	0	2571	2115	1948	1730	1535	2145	1535	1180	1090	845
MUNIRA	53	F	Married	12000	Diabetes	Newly Dignose	1550	Tab Daporm trio 500mg	No	No	Yes	Yes	143	83		135	81	140	320	7.2	No	No	No	No	0	0	0	0	0	30	30	30	30	30	0	0	0	0	0	4235	3815	3542	3350	3215	2285	1650	1345	1050	980
TASLIM	48	F	Married	18000	Diabetes	Newly Dignose	1500	Tab Uysov -M ,Tab Udapa	No	No	Yes	Yes	146	57		130	80	128	300	8.2	No	No	No	No	0	0	0	0	0	30	30	30	30	30	0	0	0	0	0	2164	1864	1628	1425	1168	2180	1580	1275	1100	920
HALEEMA	57	F	Married	NIL	Diabetes	Newly Dignose	1300	Tab Gylcomet SR	No	No	Yes	Yes	145	75		122	79	149	240	8.1	No	No	No	No	0	0	0	0	0	30	30	30	30	30	0	0	0	0	0	2594	2178	1870	1667	1527	2385	1850	1375	1235	625
LAMISA	56	F	Married	9000	Diabetes	Newly Dignose	1260	Tab Glizid -M, Tab Vidolgo -M ,Tab Amlong	No	No	Yes	Yes	147	74		128	81	160	230	7.5	No	No	No	No	0	0	0	0	0	30	30	30	30	30	0	0	0	0	0	3065	2763	2514	2354	2065	2145	1770	1170	1020	980
KAMILAH	45	F	Married	14000	Diabetes	Newly Dignose	1400	Tab Cyra	No	No	Yes	No	144	55		127	79	135	300	7.2	No	No	No	No	0	0	0	0	0	30	30	30	30	30	0	0	0	0	0	2607	2270	2075	1847	1654	2150	1765	1260	980	710
KAILASH	55	M	Married	11000	Diabetes	Newly Dignose	1300	T. Dapanorm m 500/10, T.Glycomet GP 1	No	No	No	Yes	166	70		135	81	128	300	8.6	No	No	No	No	0	0	0	0	0	30	30	30	30	30	0	0	0	0	0	9415	9125	8876	8570	8410	2185	1545	1275	840	750
MAUJILAL	58	M	Married	9000	Diabetes	Newly Dignose	1500	T. Dapanorm trio (10/100/300), T. Revelol(25), T. Exermel 500mg	No	No	No	Yes	160	48		130	80	149	250	8.4	No	No	No	No	0	0	0	0	0	30	30	30	30	30	0	0	0	0	0	2345	2005	1785	1578	1325	2375	1820	1385	1045	850
AFHAM	55	M	Married	16000	Diabetes	Newly Dignose	1500	T. Glimfirst MV2	No	No	No	Yes	162	78		132	80	145	240	8.6	No	No	No	No	0	0	0	0	0	30	30	30	30	30	0	0	0	0	0	2758	2430	2214	2025	1738	2285	1850	1350	1250	567
SHADI	45	F	Married	10000	Diabetes	Newly Dignose	1500	T. Glimfirst MV2, T. Dolo 650, T. Cloze 0.25mg	No	No	Yes	No	149	64		120	81	135	270	7.4	No	No	No	No	0	0	0	0	0	30	30	30	30	30	0	0	0	0	0	2369	2046	1725	1514	1359	2160	1685	1385	1250	1080
HAMDI	45	F	Married	13500	Diabetes	Newly Dignose	1250	T. Glimfirst MV2, T. Cloze 0.25mg	No	No	Yes	Yes	147	62		125	82	140	281	8.3	No	No	No	No	0	0	0	0	0	30	30	30	30	30	0	0	0	0	0	2550	2180	1800	1640	1520	2180	1565	1265	1035	920
LATIF	80	F	Married	10000	Diabetes	Newly Dignose	1500	T. Deben MR, Cap. Rabitis DRS, T. Gabaneuron NT	No	No	Yes	Yes	139	57		135	80	135	315	8.4	No	No	No	No	0	0	0	0	0	30	30	30	30	30	0	0	0	0	0	2158	1768	1540	1329	1153	2275	1750	1275	1065	720
JAMEELAH	48	F	Married	NIL	Diabetes	Newly Dignose	1500	Tab Sitabite M 50/500,Tab Pregator75,Tab Clre D	No	No	Yes	Yes	148	55		125	80	140	220	7.5	No	No	No	No	0	0	0	0	0	30	30	30	30	30	0	0	0	0	0	5325	5045	4724	4503	4320	2185	1745	1350	980	720
MALIK	45	M	Married	7500	Diabetes	Newly Dignose	1200	Tab nertri 8,Cap Intenerve,Tab Caldan	No	No	No	Yes	163	46		135	80	130	246	8.5	No	No	No	No	0	0	0	0	0	30	30	30	30	30	0	0	0	0	0	2624	2203	2025	1878	1634	2175	1580	1265	1090	845
AMEERA	48	F	Married	NIL	Diabetes	Newly Dignose	1260	Tab Glufirst 2mg,Tab Dapanorm Trio,Tab Exermet500mg,CaldamM2,Tab Revelol25mg	No	No	Yes	Yes	145	60		128	82	128	275	7.5	No	No	No	No	0	0	0	0	0	30	30	30	30	30	0	0	0	0	0	2704	2490	2147	1905	2605	2265	1685	1485	1200	1020
EIJAZ	55	M	Married	5000	Diabetes	Newly Dignose	1400	Tab Glufirst -GV-2,Tab Dapasaen-S,Tab Intenerve,Tab -,Rosuless F,Tab Insart-CC,Cap Rabysam	No	Yes	No	Yes	162	80		135	79	136	230	7.8	No	No	No	No	0	0	0	0	0	30	30	30	30	30	0	0	0	0	0	4225	3907	3738	3516	2120	2385	1785	1385	1235	538
ASHER	55	M	Married	13000	Diabetes	Newly Dignose	1500	Tab Galvus Met 50/500,Tab Udapa,Tab pregab,Tab Meganeuron	No	No	No	Yes	165	72		130	81	149	300	8.2	No	No	No	No	0	0	0	0	0	30	30	30	30	30	0	0	0	0	0	2154	1890	1634	1425	1117	2175	1685	1265	1020	920
BARRAQ	55	M	Married	17000	Diabetes	Newly Dignose	1550	Tab Sitacip-M ,TabThyronorm ,Cap Intenerve	No	No	No	No	161	78		129	79	156	315	7.5	No	No	No	No	0	0	0	0	0	30	30	30	30	30	0	0	0	0	0	2435	2180	1980	1780	1237	2085	1500	1180	975	720
AFIQ	48	M	Married	14500	Diabetes	Newly Dignose	1400	Glycohale-FB ,Tab Dupent 40mg ,Syp Dupent-Gel,TabCTD-T 6.25mg ,Cap Ecosprin-AV,Tab Exermet SR	No	No	No	Yes	168	65		135	80	145	286	8.2	No	No	No	No	0	0	0	0	0	30	30	30	30	30	0	0	0	0	0	9482	9016	8768	8584	8445	2375	1730	1230	1040	890
FATMA	45	F	Married	8500	Diabetes	Newly Dignose	1300	Tab Glufirst GV-2	No	No	Yes	Yes	148	82		128	80	132	245	8.5	No	No	No	No	0	0	0	0	0	30	30	30	30	30	0	0	0	0	0	2695	2225	2025	1816	1635	2195	1685	1250	1020	850
SAFWAN	49	M	Married	3000	Diabetes	Newly Dignose	1350	Tab GlufirstGU 2 ,Tab Sitabite50/500 ,Tab cloze0.25mg	No	No	No	Yes	162	76		125	80	150	270	7.6	No	No	No	No	0	0	0	0	0	30	30	30	30	30	0	0	0	0	0	2064	1736	1520	1325	1027	2100	1690	1285	840	720
SARVESH	58	M	Married	15000	Diabetes	Newly Dignose	1500	Tab Daporm trio 500mg	No	No	No	Yes	160	76		130	81	129	280	8.4	No	No	No	No	0	0	0	0	0	30	30	30	30	30	0	0	0	0	0	2165	1805	1615	1525	1125	2385	1785	1365	1050	735
SURENDRA	55	M	Married	35000	Diabetes	Newly Dignose	1500	Tab Uysov -M ,Tab Udapa	No	No	No	No	165	83		135	82	125	250	7.5	No	No	No	No	0	0	0	0	0	30	30	30	30	30	0	0	0	0	0	4180	3950	3614	3417	3135	2245	1765	1290	980	720
SHEHYAR	40	F	Married	10000	Diabetes	Newly Dignose	1500	Tab Gylcomet SR	No	No	Yes	Yes	145	70		127	80	160	235	7.1	No	No	No	No	0	0	0	0	0	30	30	30	30	30	0	0	0	0	0	2628	2416	2256	2005	1624	2185	1800	1385	1275	1020
HABIBA	53	F	Married	18000	Diabetes	Newly Dignose	1550	Tab Glizid -M, Tab Vidolgo -M ,Tab Amlong	No	No	Yes	Yes	147	62		128	80	132	225	7.8	No	No	No	No	0	0	0	0	0	30	30	30	30	30	0	0	0	0	0	3548	3158	2849	2683	2547	2175	1785	1275	1250	637
RAJESH	50	M	Married	12000	Diabetes	Newly Dignose	1400	Tab Cyra	No	No	No	No	163	56		130	80	148	280	6.9	No	No	No	No	0	0	0	0	0	30	30	30	30	30	0	0	0	0	0	2705	2447	2205	2078	1735	2135	1645	1285	1290	1145
VIKASH	35	M	Married	20000	Diabetes	Newly Dignose	1500	T. Glimfirst MV2	No	No	No	Yes	160	60		135	80	127	300	7.1	No	No	No	No	0	0	0	0	0	30	30	30	30	30	0	0	0	0	0	2394	1925	1565	1375	1395	2265	1745	1375	980	720
MAWIYAH	48	F	Married	16000	Diabetes	Newly Dignose	1300	Tab GlufirstGU 2 ,Tab Sitabite50/500 ,Tab cloze0.25mg	No	No	Yes	Yes	145	65		132	81	135	240	8.2	No	No	No	No	0	0	0	0	0	30	30	30	30	30	0	0	0	0	0	3475	3140	2914	2726	2438	2265	1675	1275	1100	1090
ARMAAN	47	M	Married	20000	Diabetes	Newly Dignose	1250	Tab Gylcomet SR	No	No	No	Yes	159	80		125	79	128	220	7.4	No	No	No	No	0	0	0	0	0	30	30	30	30	30	0	0	0	0	0	2745	2480	2280	2080	1754	2175	1785	1385	1265	524
FOZIAH	54	F	Married	14000	Diabetes	Newly Dignose	1600	Tab Gylcomet SR	No	No	Yes	Yes	149	57		125	80	140	305	8.4	No	No	No	No	0	0	0	0	0	30	30	30	30	30	0	0	0	0	0	3548	3108	2885	2684	2568	2285	1750	1285	1140	1075
RUBABA	50	F	Married	15000	Diabetes	Newly Dignose	1500	Tab Glizid -M, Tab Vidolgo -M ,Tab Amlong	No	No	Yes	No	141	74		128	81	145	250	7.2	No	No	No	No	0	0	0	0	0	30	30	30	30	30	0	0	0	0	0	2413	2115	1925	1726	1413	2185	1630	1275	1020	920
HAMDI	45	M	Married	10000	Diabetes	Newly Dignose	1500	Tab Gylcomet SR	No	No	No	Yes	167	58		136	80	158	300	7.5	No	No	No	No	0	0	0	0	0	30	30	30	30	30	0	0	0	0	0	2317	2030	1617	1450	1315	2195	1750	1285	720	630
AASIMAH	46	F	Married	NIL	Diabetes	Newly Dignose	1550	Tab GlufirstGU 2 ,Tab Sitabite50/500 ,Tab cloze0.25mg	No	Yes	Yes	Yes	141	47		135	80	130	305	8.1	No	No	No	No	0	0	0	0	0	30	30	30	30	30	0	0	0	0	0	3127	2850	2514	2330	2125	2175	1685	1380	1220	537
ELMA	55	F	Married	13000	Diabetes	Newly Dignose	1600	T. Dapanorm m 500/10, T.Glycomet GP 1	No	No	Yes	Yes	145	63		125	81	165	248	7.2	No	No	No	No	0	0	0	0	0	30	30	30	30	30	0	0	0	0	0	2542	2142	1845	1678	1547	2285	1765	1275	920	720
AMAN	55	M	Married	17000	Diabetes	Newly Dignose	1600	T. Dapanorm trio (10/100/300), T. Revelol(25), T. Exermel 500mg	No	No	No	Yes	168	64		138	82	161	261	7.1	No	No	No	No	0	0	0	0	0	30	30	30	30	30	0	0	0	0	0	4222	4015	3835	3525	3228	2145	1685	1275	1200	985
ALVINA	45	F	Married	9000	Diabetes	Newly Dignose	1500	T. Glimfirst MV2	No	No	Yes	Yes	147	82		135	79	158	235	8.2	No	No	No	No	0	0	0	0	0	30	30	30	30	30	0	0	0	0	0	2779	2415	2175	1930	1745	2365	1685	1285	1150	875
HUMRA	40	F	Married	6050	Diabetes	Newly Dignose	1450	T. Glimfirst MV2, T. Dolo 650, T. Cloze 0.25mg	No	No	Yes	Yes	140	68		130	81	137	300	7.5	No	No	No	No	0	0	0	0	0	30	30	30	30	30	0	0	0	0	0	3278	2836	2526	2395	2238	2175	1750	1275	1050	720
OSAMA	50	F	Married	12000	Diabetes	Newly Dignose	1300	T. Glimfirst MV2, T. Cloze 0.25mg	No	No	Yes	Yes	143	75		130	80	147	280	8.4	No	No	No	No	0	0	0	0	0	30	30	30	30	30	0	0	0	0	0	3820	3540	3270	3050	2845	2285	1675	1285	1100	845
PRASANT	47	M	Married	15000	Diabetes	Newly Dignose	1400	T. Deben MR, Cap. Rabitis DRS, T. Gabaneuron NT	No	No	No	No	165	53		122	80	149	240	7.9	No	No	No	No	0	0	0	0	0	30	30	30	30	30	0	0	0	0	0	2773	2440	2214	2030	1770	2365	1745	1365	1220	647
NIBIDA	45	F	Married	8000	Diabetes	Newly Dignose	1250	Tab Sitabite M 50/500,Tab Pregator75,Tab Clre D	No	No	Yes	No	147	75		123	80	150	230	7.1	No	No	No	No	0	0	0	0	0	30	30	30	30	30	0	0	0	0	0	2391	2027	1723	1528	1395	2185	1685	1265	1075	720
CHANDRA PRAKASH	50	M	Married	16000	Diabetes	Newly Dignose	1500	Tab nertri 8,Cap Intenerve,Tab Caldan	No	No	No	Yes	164	85		121	81	165	270	7.6	No	No	No	No	0	0	0	0	0	30	30	30	30	30	0	0	0	0	0	5224	4914	4776	4526	4220	2175	1745	1265	1240	945
KAMAL	42	M	Married	21000	Diabetes	Newly Dignose	1250	Tab Glufirst 2mg,Tab Dapanorm Trio,Tab Exermet500mg,CaldamM2,Tab Revelol25mg	No	No	No	Yes	167	72		127	80	145	255	7.4	No	No	No	No	0	0	0	0	0	30	30	30	30	30	0	0	0	0	0	3607	3263	2978	2725	2607	2230	1735	1340	1150	543
TARUNA	50	F	Married	14000	Diabetes	Newly Dignose	1500	Tab Glufirst -GV-2,Tab Dapasaen-S,Tab Intenerve,Tab -,Rosuless F,Tab Insart-CC,Cap Rabysam	No	No	Yes	Yes	145	59		135	80	135	250	6.4	No	No	No	No	0	0	0	0	0	30	30	30	30	30	0	0	0	0	0	3735	3480	3180	2955	2735	2120	1650	1235	1165	845
SIKHA	56	F	Married	19000	Diabetes	Newly Dignose	1600	Tab Galvus Met 50/500,Tab Udapa,Tab pregab,Tab Meganeuron	No	No	Yes	Yes	143	60		133	80	128	255	7.3	No	No	No	No	0	0	0	0	0	30	30	30	30	30	0	0	0	0	0	2468	2140	1916	1725	1465	2245	1745	1350	1050	720
ALKA	49	F	Married	7000	Diabetes	Newly Dignose	1200	Tab Sitacip-M ,TabThyronorm ,Cap Intenerve	No	No	Yes	No	142	48		130	81	129	300	7.3	No	No	No	No	0	0	0	0	0	30	30	30	30	30	0	0	0	0	0	2705	2445	2178	1938	1705	2180	1750	1340	1150	920
BASIMAH	55	F	Married	NIL	Diabetes	Newly Dignose	1500	Glycohale-FB ,Tab Dupent 40mg ,Syp Dupent-Gel,TabCTD-T 6.25mg ,Cap Ecosprin-AV,Tab Exermet SR	No	No	Yes	Yes	148	61		125	79	141	303	8.4	No	No	No	No	0	0	0	0	0	30	30	30	30	30	0	0	0	0	0	2675	2285	2024	1850	1675	2265	1645	1265	1180	935
MUSKAN	40	F	Married	8000	Diabetes	Newly Dignose	1500	Tab Glufirst GV-2	No	No	Yes	Yes	142	69		120	81	150	290	7.2	No	No	No	No	0	0	0	0	0	30	30	30	30	30	0	0	0	0	0	3157	2815	2520	2430	2157	2185	1620	1275	1050	920
FATEH	48	F	Married	11000	Diabetes	Newly Dignose	1450	Tab GlufirstGU 2 ,Tab Sitabite50/500 ,Tab cloze0.25mg	No	No	Yes	No	148	42		132	79	145	255	7.3	No	No	No	No	0	0	0	0	0	30	30	30	30	30	0	0	0	0	0	9516	9089	8756	8625	8516	2130	1530	1250	1040	547
AANISH	58	M	Married	16000	Diabetes	Newly Dignose	1550	Tab Daporm trio 500mg	No	No	No	Yes	168	55		128	81	132	270	7.5	No	No	No	No	0	0	0	0	0	30	30	30	30	30	0	0	0	0	0	3722	3440	3130	2975	2722	2245	1670	1265	1050	865
MIFTAH	43	F	Married	10000	Diabetes	Newly Dignose	1500	Tab Uysov -M ,Tab Udapa	No	Yes	Yes	Yes	146	83		129	79	160	220	7.6	No	No	No	No	0	0	0	0	0	30	30	30	30	30	0	0	0	0	0	2538	2225	2086	1845	1538	2285	1685	1350	1020	735
FOZIAH	50	F	Married	NIL	Diabetes	Newly Dignose	1500	Tab Gylcomet SR	No	No	Yes	Yes	145	65		130	81	165	280	7.9	No	No	No	No	0	0	0	0	0	30	30	30	30	30	0	0	0	0	0	3845	3445	3145	2980	2845	2245	1750	1350	980	745
FAJER	46	M	Married	14000	Diabetes	Newly Dignose	1400	Tab Glizid -M, Tab Vidolgo -M ,Tab Amlong	No	Yes	No	Yes	160	64		132	79	125	302	8.4	No	No	No	No	0	0	0	0	0	30	30	30	30	30	0	0	0	0	0	4157	3800	3568	3325	3155	2585	1685	1285	1100	785
HUSAN	42	M	Married	16000	Diabetes	Newly Dignose	1300	Tab Cyra	No	No	No	Yes	168	53		128	80	152	230	8.3	No	No	No	No	0	0	0	0	0	30	30	30	30	30	0	0	0	0	0	3084	2745	2425	2225	2054	2175	1685	1275	1120	985
MISHEENAH	58	M	Married	14500	Diabetes	Newly Dignose	1500	T. Glimfirst MV2	No	No	No	No	162	55		129	80	145	300	7.4	No	No	No	No	0	0	0	0	0	30	30	30	30	30	0	0	0	0	0	2135	1885	1480	1240	1135	2145	1675	1355	1220	628
SABEEN	38	F	Married	8000	Diabetes	Newly Dignose	1400	Tab GlufirstGU 2 ,Tab Sitabite50/500 ,Tab cloze0.25mg	No	No	Yes	Yes	145	62		125	81	160	305	8.2	No	No	No	No	0	0	0	0	0	30	30	30	30	30	0	0	0	0	0	2295	1980	1725	1530	1235	2135	1780	1265	1050	950
MAHAD	52	M	Married	15000	Diabetes	Newly Dignose	1500	Tab Gylcomet SR	No	No	No	Yes	163	70		135	79	138	315	7.5	No	No	No	No	0	0	0	0	0	30	30	30	30	30	0	0	0	0	0	3127	2836	2530	2354	2120	2235	1685	1385	1250	678
ALVINA	33	F	Married	12000	Diabetes	Newly Dignose	1300	Tab Gylcomet SR	No	No	Yes	Yes	148	66		132	81	128	240	7.9	No	No	No	No	0	0	0	0	0	30	30	30	30	30	0	0	0	0	0	2067	1725	1527	1378	1062	2345	1650	1285	980	845
JASIM	40	F	Married	7000	Diabetes	Newly Dignose	1400	Tab Glizid -M, Tab Vidolgo -M ,Tab Amlong	No	No	Yes	Yes	140	73		125	80	155	250	8.6	No	No	No	No	0	0	0	0	0	30	30	30	30	30	0	0	0	0	0	2240	1800	1580	1305	1240	2285	1700	1385	1180	524
SADDHAM	50	M	Married	27000	Diabetes	Newly Dignose	1500	Tab Gylcomet SR	No	No	No	Yes	162	70		120	81	128	260	7.1	No	No	No	No	0	0	0	0	0	30	30	30	30	30	0	0	0	0	0	3548	3115	2856	2745	2547	2285	1645	1275	1080	850
AFID	55	M	Married	19500	Diabetes	Newly Dignose	1500	Tab GlufirstGU 2 ,Tab Sitabite50/500 ,Tab cloze0.25mg	No	No	No	Yes	162	58		130	79	140	295	7.8	No	No	No	No	0	0	0	0	0	30	30	30	30	30	0	0	0	0	0	4223	3973	3705	3528	3225	2185	1785	1345	1280	1045
MAIRA	48	F	Married	14000	Diabetes	Newly Dignose	1500	T. Glimfirst MV2	No	No	Yes	No	141	56		128	81	132	280	7.4	No	No	No	No	0	0	0	0	0	30	30	30	30	30	0	0	0	0	0	2425	2146	1955	1620	1427	2165	1775	1375	1180	985
IZYAN	55	M	Married	16000	Diabetes	Newly Dignose	1300	T. Dapanorm m 500/10, T.Glycomet GP 1	No	No	No	Yes	160	74		122	79	150	295	7.3	No	No	No	No	0	0	0	0	0	30	30	30	30	30	0	0	0	0	0	2145	1805	1625	1480	1140	2185	1650	1265	1150	945
MEENA	45	F	Married	7000	Diabetes	Newly Dignose	1200	T. Dapanorm trio (10/100/300), T. Revelol(25), T. Exermel 500mg	No	No	Yes	Yes	146	77		130	80	156	280	8.1	No	No	No	No	0	0	0	0	0	30	30	30	30	30	0	0	0	0	0	2427	2145	1850	1653	1435	2385	1735	1365	1120	920
RAM GADESH	50	M	Married	10000	Diabetes	Newly Dignose	1400	T. Glimfirst MV2	No	Yes	No	Yes	167	59		130	81	135	300	8.2	No	No	No	No	0	0	0	0	0	30	30	30	30	30	0	0	0	0	0	5347	5025	4814	4534	4257	2375	1720	1375	1180	875
AFHAD	57	M	Married	35000	Diabetes	Newly Dignose	1300	T. Glimfirst MV2, T. Dolo 650, T. Cloze 0.25mg	No	No	No	Yes	160	61		135	80	155	315	7.5	No	No	No	No	0	0	0	0	0	30	30	30	30	30	0	0	0	0	0	2458	2178	1925	1630	1429	2195	1685	1375	980	720
RADHE SHYAM	60	M	Married	18000	Diabetes	Newly Dignose	1500	T. Glimfirst MV2, T. Cloze 0.25mg	No	No	No	Yes	168	63		132	80	159	230	7.1	No	No	No	No	0	0	0	0	0	30	30	30	30	30	0	0	0	0	0	2647	2250	2008	1870	1645	2175	1620	1220	1140	485
RAFEEK	49	M	Married	8000	Diabetes	Newly Dignose	1500	T. Deben MR, Cap. Rabitis DRS, T. Gabaneuron NT	No	No	No	Yes	165	85		120	81	145	265	6.5	No	No	No	No	0	0	0	0	0	30	30	30	30	30	0	0	0	0	0	3155	2826	2540	2341	2157	2295	1645	1250	1275	1095
KAYSAN	55	M	Married	15000	Diabetes	Newly Dignose	1500	Tab Sitabite M 50/500,Tab Pregator75,Tab Clre D	No	No	No	Yes	162	78		132	79	125	280	7.5	No	No	No	No	0	0	0	0	0	30	30	30	30	30	0	0	0	0	0	3607	3270	3015	2825	2605	2350	1570	1255	1185	547
HAMDI	55	F	Married	NIL	Diabetes	Newly Dignose	1500	Tab nertri 8,Cap Intenerve,Tab Caldan	No	No	Yes	No	144	71		122	80	133	270	7.4	No	No	No	No	0	0	0	0	0	30	30	30	30	30	0	0	0	0	0	2776	2505	2375	2175	1775	2285	1620	1360	1100	980
ZAHARA	40	F	Married	10000	Diabetes	Newly Dignose	1400	Tab Glufirst 2mg,Tab Dapanorm Trio,Tab Exermet500mg,CaldamM2,Tab Revelol25mg	No	No	Yes	Yes	140	63		135	80	162	230	8.2	No	No	No	No	0	0	0	0	0	30	30	30	30	30	0	0	0	0	0	3530	3186	2940	2730	2530	2275	1745	1365	980	720
ANJA	50	F	Married	NIL	Diabetes	Newly Dignose	1200	Tab Glufirst -GV-2,Tab Dapasaen-S,Tab Intenerve,Tab -,Rosuless F,Tab Insart-CC,Cap Rabysam	No	No	Yes	Yes	145	86		125	82	148	295	7.4	No	No	No	No	0	0	0	0	0	30	30	30	30	30	0	0	0	0	0	8019	7842	7585	7425	7015	2365	1645	1265	1175	560
ALVINA	55	F	Married	13000	Diabetes	Newly Dignose	1500	Tab Galvus Met 50/500,Tab Udapa,Tab pregab,Tab Meganeuron	No	No	Yes	Yes	142	56		127	81	133	280	8.5	No	No	No	No	0	0	0	0	0	30	30	30	30	30	0	0	0	0	0	2146	1845	1680	1480	1142	2250	1675	1375	1050	720
NIHAL	54	M	Married	18000	Diabetes	Newly Dignose	1500	Tab Sitacip-M ,TabThyronorm ,Cap Intenerve	No	No	No	Yes	158	68		124	80	160	249	7.4	No	No	No	No	0	0	0	0	0	30	30	30	30	30	0	0	0	0	0	3268	2836	2640	2430	2264	2165	1685	1320	1265	543
MARIYA	45	F	Married	5000	Diabetes	Newly Dignose	1300	Glycohale-FB ,Tab Dupent 40mg ,Syp Dupent-Gel,TabCTD-T 6.25mg ,Cap Ecosprin-AV,Tab Exermet SR	No	No	Yes	Yes	147	75		125	80	132	232	7.9	No	No	No	No	0	0	0	0	0	30	30	30	30	30	0	0	0	0	0	2737	2315	2145	1948	1735	2185	1580	1265	1280	1085
FAKEEHAH	50	M	Married	11000	Diabetes	Newly Dignose	1500	Tab Glufirst GV-2	No	No	No	No	163	80		128	81	155	266	7.4	No	No	No	No	0	0	0	0	0	30	30	30	30	30	0	0	0	0	0	2831	2415	2252	2035	1831	2180	1620	1320	1175	985
NADIRA	40	F	Married	NIL	Diabetes	Newly Dignose	1200	Tab GlufirstGU 2 ,Tab Sitabite50/500 ,Tab cloze0.25mg	No	No	Yes	No	145	73		130	80	146	310	8.5	No	No	No	No	0	0	0	0	0	30	30	30	30	30	0	0	0	0	0	2162	1845	1615	1530	1162	2275	1710	1265	1180	985
KEHARA	47	F	Married	5000	Diabetes	Newly Dignose	1500	Tab Daporm trio 500mg	No	No	Yes	No	148	67		127	81	135	225	7.2	No	No	No	No	0	0	0	0	0	30	30	30	30	30	0	0	0	0	0	2125	1980	1775	1685	1125	2150	1580	1275	1020	965
NURYA	42	F	Married	12000	Diabetes	Newly Dignose	1350	Tab Uysov -M ,Tab Udapa	No	No	Yes	Yes	147	82		120	82	122	290	8.1	No	No	No	No	0	0	0	0	0	30	30	30	30	30	0	0	0	0	0	3045	2868	2645	2465	2065	2145	1645	1345	980	720
RIFAT	40	F	Married	NIL	Diabetes	Newly Dignose	1260	Tab Gylcomet SR	No	No	Yes	Yes	148	65		128	80	145	225	7.1	No	No	No	No	0	0	0	0	0	30	30	30	30	30	0	0	0	0	0	2685	2215	2056	1830	1685	2585	2065	1465	1250	598
NISHANT	56	M	Married	17000	Diabetes	Newly Dignose	1500	Tab Glizid -M, Tab Vidolgo -M ,Tab Amlong	No	No	No	Yes	155	58		130	81	160	317	7.5	No	No	No	No	0	0	0	0	0	30	30	30	30	30	0	0	0	0	0	2394	1938	1675	1575	1394	2165	1675	1365	1060	720
ANEEQA	42	F	Married	NIL	Diabetes	Newly Dignose	1400	Tab Cyra	No	No	Yes	Yes	149	84		129	80	140	300	7.2	No	No	No	No	0	0	0	0	0	30	30	30	30	30	0	0	0	0	0	2245	1835	1608	1480	1245	2275	1780	1350	1245	920
AFHAM	50	M	Married	18000	Diabetes	Newly Dignose	1500	T. Glimfirst MV2	No	No	No	Yes	162	73		130	81	133	280	8.1	No	No	No	No	0	0	0	0	0	30	30	30	30	30	0	0	0	0	0	5418	5027	4815	4625	4415	2285	1680	1100	980	710
KAFEEL	58	M	Married	17000	Diabetes	Newly Dignose	1500	Tab GlufirstGU 2 ,Tab Sitabite50/500 ,Tab cloze0.25mg	No	Yes	No	Yes	165	74		128	82	125	278	8.5	No	No	No	No	0	0	0	0	0	30	30	30	30	30	0	0	0	0	0	2456	2156	1952	1735	1456	2175	1645	1245	1020	524
KHALID	46	M	Married	10000	Diabetes	Newly Dignose	1400	Tab Gylcomet SR	No	No	No	Yes	160	70		135	80	138	226	8.2	No	No	No	No	0	0	0	0	0	30	30	30	30	30	0	0	0	0	0	3604	3247	3025	2826	2602	2245	1680	1285	1080	845
YASIR	44	M	Married	13000	Diabetes	Newly Dignose	1500	Tab Gylcomet SR	No	No	No	Yes	158	69		126	80	140	260	7.8	No	No	No	No	0	0	0	0	0	30	30	30	30	30	0	0	0	0	0	3657	3215	3070	2814	2605	2275	1785	1350	1120	720
FORHANA	50	F	Married	18000	Diabetes	Newly Dignose	1560	Tab Glizid -M, Tab Vidolgo -M ,Tab Amlong	No	No	Yes	No	146	58		130	81	130	255	8.3	No	No	No	No	0	0	0	0	0	30	30	30	30	30	0	0	0	0	0	2445	2145	1945	1740	1415	2185	1685	1250	1050	745
NADEEN	45	M	Married	15000	Diabetes	Newly Dignose	1500	Tab Gylcomet SR	No	No	No	Yes	162	77		120	79	133	301	8.5	No	No	No	No	0	0	0	0	0	30	30	30	30	30	0	0	0	0	0	2185	1835	1625	1480	1180	2265	1785	1375	1150	720
JASMINA	55	F	Married	10000	Diabetes	Newly Dignose	1550	Tab GlufirstGU 2 ,Tab Sitabite50/500 ,Tab cloze0.25mg	No	No	Yes	Yes	142	68		125	80	145	275	7.1	No	No	No	No	0	0	0	0	0	30	30	30	30	30	0	0	0	0	0	2775	2325	2128	1916	1778	2185	1680	1385	1190	845
													152.738	65.7375		129.606	80.3063	143.981	268.413	7.67687					0	0	0	0	0	30	30	30	30	30	0	0	0	0	0	3086	2840	2614	2345	2086	2385	1780	1285	1090	545
													8.85331	10.9536		4.69587	0.806202	12.7173	29.2847	0.571098																				3205.04	2872.61	2613.3	2411.16	2196.36	2244.54	1703.16	1302.39	1098.22	814.231
																																								1518.55	1512.29	1506.32	1502.98	1516.09	113.19	130.943	96.8579	108.105	158.861
[truncated: 22 more columns]
